1  
2  
3  
4  
5  
6  
7  
8  
9  
10  
11  
12  
13  
14  
15  
16  
17  
18  
19  
20  
21  
22  
23  
24  
25  
26  
27  
28  
29  
30  
31  
32  
33  
34  
35  
36  
37  
38  
39  
40  
41  
42  
43  
44

**Insights into the secondary structural ensembles of the full SARS-CoV-2 RNA genome in infected cells**

Tammy C. T. Lan<sup>1</sup>, Matthew F. Allan<sup>1,2,3</sup>, Lauren E. Malsick<sup>4</sup>, Stuti Khandwala<sup>1,5,6</sup>, Sherry S. Y. Nyeo<sup>1,5,6</sup>, Yu Sun<sup>7</sup>, Junjie U. Guo<sup>7</sup>, Mark Bathe<sup>3</sup>, Anthony Griffiths<sup>4</sup>, Silvi Rouskin<sup>1†</sup>

<sup>1</sup> Whitehead Institute for Biomedical Research, Cambridge, Massachusetts, USA

<sup>2</sup> Computational and Systems Biology, Massachusetts Institute of Technology, Cambridge, Massachusetts, USA

<sup>3</sup> Department of Biological Engineering, Massachusetts Institute of Technology, Cambridge, Massachusetts, USA

<sup>4</sup> National Emerging Infectious Diseases Laboratories, Boston University School of Medicine, Boston University, Boston, Massachusetts, USA

<sup>5</sup> Department of Biology, Massachusetts Institute of Technology, Cambridge, Massachusetts, USA

<sup>6</sup> Department of Electrical Engineering & Computer Science, Massachusetts Institute of Technology, Cambridge, Massachusetts, USA

<sup>7</sup> Department of Neuroscience, Yale University School of Medicine, New Haven, CT, USA

† To whom correspondence should be addressed: E-mail: [srouskin@wi.mit.edu](mailto:srouskin@wi.mit.edu)

45 **Summary**

46

47 SARS-CoV-2 is a betacoronavirus with a single-stranded, positive-sense, 30-kilobase  
48 RNA genome responsible for the ongoing COVID-19 pandemic. Currently, there are no  
49 antiviral drugs with proven efficacy, and development of these treatments are hampered  
50 by our limited understanding of the molecular and structural biology of the virus. Like  
51 many other RNA viruses, RNA structures in coronaviruses regulate gene expression and  
52 are crucial for viral replication. Although genome and transcriptome data were recently  
53 reported, there is to date little experimental data on native RNA structures in SARS-CoV-  
54 2 and most putative regulatory sequences are functionally uncharacterized. Here we  
55 report secondary structure ensembles of the entire SARS-CoV-2 genome in infected  
56 cells at single nucleotide resolution using dimethyl sulfate mutational profiling with  
57 sequencing (DMS-MaPseq) and the algorithm ‘detection of RNA folding ensembles  
58 using expectation–maximization’ clustering (DREEM). Our results reveal previously  
59 undescribed alternative RNA conformations across the genome, including structures of  
60 the frameshift stimulating element (FSE), a major drug target, that are drastically different  
61 from prevailing *in vitro* population average models. Importantly, we find that this  
62 structural ensemble promotes frameshifting rates (~40%) similar to *in vivo* ribosome  
63 profiling studies and much higher than the canonical minimal FSE (~20%). Overall, our  
64 result highlight the value of studying RNA folding in its native, dynamic and cellular  
65 context. The genomic structures detailed here lays the groundwork for coronavirus RNA  
66 biology and will guide the design of SARS-CoV-2 RNA-based therapeutics.

## 67 Introduction

68  
69 Severe acute respiratory syndrome coronavirus 2 (SARS-CoV-2) is the causative agent  
70 of coronavirus disease 2019 (COVID-19), recently declared a global pandemic by the  
71 World Health Organization (WHO). SARS-CoV-2 is an enveloped virus belonging to the  
72 genus *betacoronavirus*, which also includes SARS-CoV, the virus responsible for the  
73 2003 SARS outbreak, and Middle East respiratory syndrome coronavirus (MERS-CoV),  
74 the virus responsible for the 2012 MERS outbreak. Despite the devastating effects these  
75 viruses have had on public health and the economy, currently no effective antiviral  
76 treatment exist. There is therefore an urgent need to understand their unique RNA  
77 biology and develop new therapeutics against this class of viruses.

78  
79 Coronaviruses (CoVs) have single-stranded and positive-sense genomes that are the  
80 largest of all known RNA viruses (27 – 32 kb) (Masters, 2006). Prior to the emergence of  
81 SARS-CoV-2, most studies on secondary structures within coronavirus RNA genomes  
82 focused on several conserved regions that are essential viral replication: the 5' UTR, the  
83 3' UTR, and the frameshift stimulating element (FSE) (Plant *et al.*, 2005; Yang and  
84 Leibowitz, 2015). Functional studies have revealed the importance of their secondary  
85 structures for viral transcription and replication (Brierley, Digard and Inglis, 1989; Liu *et*  
86 *al.*, 2007; Li *et al.*, 2008; Yang and Leibowitz, 2015).

87  
88 The FSE straddles the boundary of ORF1a and ORF1b and causes the ribosome to “slip”  
89 and shift register by -1 nt in order to bypass a stop codon at the end of ORF1a and  
90 translate to the end of ORF1ab, producing a large polyprotein comprising 15  
91 nonstructural proteins (nsps), including the viral RNA-dependent RNA polymerase  
92 (nsp12) and helicase (nsp13) (Brierley *et al.*, 1987; Plant *et al.*, 2005). Studies on multiple  
93 coronaviruses have shown that an optimal ribosomal frameshifting rate is critical, and  
94 small differences in percentage of frameshifting lead to dramatic differences in genomic  
95 RNA production and infection dose (Plant *et al.*, 2010). Therefore, the FSE has emerged  
96 as a major drug target for binding of small molecules that can influence the rate of  
97 ribosome slippage and is under active investigation to be used as a treatment against  
98 SARS-CoV-2 (Sun *et al.*, 2020; Zhang *et al.*, 2020).

99  
100 The structures of coronavirus FSEs have been studied extensively. Short segments of  
101 the core FSE from both SARS-CoV-1 (Plant *et al.*, 2005) and SARS-CoV-2 (Zhang *et al.*,  
102 2020) fold into complex structure with a three-stemmed pseudoknot. Small molecules,  
103 locked nucleic acids (LNAs), and mutations that are intended to disrupt this structure  
104 have been shown to impair viral replication (Kelly *et al.*, 2020; Sun *et al.*, 2020; Zhang *et*  
105 *al.*, 2020). However, despite the importance of the FSE structure, there is to date no  
106 direct validation of the relationship between the RNA folding conformation and  
107 frameshifting rate in infected cells.

108  
109 Over the last decade, major advances in methods for RNA chemical probing have  
110 enabled genome-wide characterization of RNA structures in living cells. The most  
111 commonly used chemical probes are dimethyl sulfate (DMS) (Rouskin *et al.*, 2014) and

112 reagents in the SHAPE (Siegfried *et al.*, 2014) and icSHAPE (Spitale *et al.*, 2015) families.  
113 DMS reacts with the Watson-Crick face of adenine (A) and cytosine (C) bases and probes  
114 base pairing directly, while SHAPE and icSHAPE reagents react with the 2'-OH group of  
115 all four nucleotides and measure nucleotide flexibility as a proxy for base pairing  
116 (Cordero *et al.*, 2012). Predictions of RNA structure that use DMS reactivities as folding  
117 constraints are of similar or marginally higher accuracies than predictions using SHAPE  
118 reactivities, as the specificity of DMS for Watson-Crick base-pairing compensates for  
119 the ability of SHAPE to probe all four nucleotides (Cordero *et al.*, 2012).

120  
121 Two studies (Huston *et al.*, 2020; Manfredonia *et al.*, 2020) recently proposed models of  
122 the secondary structure of the entire genome of SARS-CoV-2 in Vero cells using SHAPE-  
123 MaP (Siegfried *et al.*, 2014). Both of these models are based on the average SHAPE  
124 reactivities at each nucleotide, so they cannot provide direct experimental evidence of  
125 alternative structures. However, the genomes of RNA viruses form not one structure but  
126 an ensemble of many structures whose dynamics regulate critical viral processes, such  
127 as splicing in HIV-1 (Tomezsko *et al.*, 2020). Thus, more work is needed to determine the  
128 dynamics of RNA structures within the SARS-CoV-2 genome and their functional roles  
129 in the viral life cycle.

130  
131 In this study, we perform DMS mutational profiling with sequencing (DMS-MaPseq)  
132 (Zubradt *et al.*, 2016) and DREEM clustering (Tomezsko *et al.*, 2020) on SARS-CoV-2  
133 infected Vero cells to generate the first insights into experimentally determined, single-  
134 nucleotide resolution genome-wide secondary structure ensembles of SARS-CoV-2. Our  
135 results reveal major differences with *in silico* and population-average structure  
136 predictions. Importantly, we highlight the physiological structure dynamics of known  
137 functional elements, such as the alternative structures at the FSE that determine  
138 frameshifting rates in cells. Our work provides experimental data on the structural  
139 biology of RNA viruses and will inform efforts on the development of RNA-based  
140 diagnostics and therapeutics for SARS-CoV-2.

141

## 142 **Results**

143

### 144 **The genome-wide structure of SARS-CoV-2 in cells**

145

146 To determine the intracellular genome-wide structure of SARS-CoV-2, we added  
147 dimethyl sulfate (DMS) to infected Vero cells and performed mutational profiling with  
148 sequencing (DMS-MapSeq) (Zubradt *et al.*, 2016) (Figure 1A). We chose DMS because  
149 it rapidly modifies unpaired adenines (A) and cytosines (C) *in vivo* at their Watson-Crick  
150 faces with negligible background effects (Zubradt *et al.*, 2016) and has been shown to  
151 yield structures of similar or slightly higher accuracies compared to SHAPE (Cordero *et al.*,  
152 2012). Our results were highly reproducible between independent biological  
153 replicates ( $R^2=0.87$ ; Figure 1B). Combined, a total of 87.2 million pairs of reads mapped  
154 to the coronavirus genome (Figure 1C), representing ~40% of total cellular RNA (post  
155 ribosomal RNA depletion). This large fraction of coronavirus reads from total intracellular  
156 RNA is consistent with previous literature using SARS-CoV-2 infected Vero cells (Kim *et al.*,  
157 2020). DMS treated samples had high signal to noise ratio, with adenines and  
158 cytosines having a mutation rate ~9-fold higher than the background (guanines and  
159 uracils). In contrast, in untreated samples the mutation rate on all four bases (0.10%)  
160 was slightly lower than previously reported average sequencing error rates of 0.24%  
161 (Pfeiffer *et al.*, 2018) (Figure 1D). We used the DMS-MaPseq data as constraints in  
162 RNAstructure (Mathews, 2004) to fold the entire SARS-CoV-2 genomic RNA  
163 (Supplementary Figure 1) and assessed the quality of our model using two approaches.

164

165

166

167 First, we introduce the data-structure correlation index (DSCI), a new metric based on  
168 the Mann-Whitney  $U$  statistic (Mann and Whitney, 1947) for quantifying how well a  
169 secondary structure model is supported by underlying chemical or enzymatic probing  
170 data (Figure 2A; see Methods). For probes that preferentially react with unpaired bases  
171 (e.g. DMS), the DSCI is defined as the probability that a randomly chosen unpaired base  
172 in the predicted structure will have higher reactivity than a randomly chosen paired base  
173 (for DMS, only A and C residues are considered for this calculation). A DSCI of 1 indicates  
174 perfect agreement between structure and data, 0.5 indicates no relationship, and 0  
175 indicates complete disagreement.

176

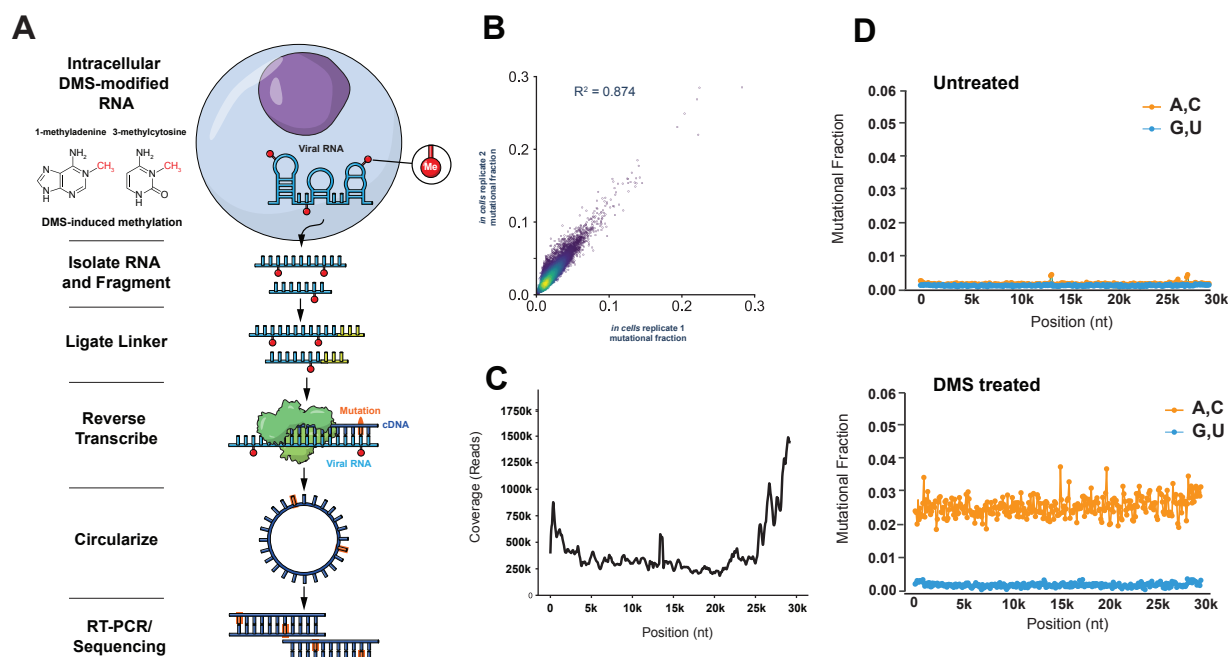

177  
178  
179  
180  
181  
182  
183  
184  
185  
186  
187  
188  
189  
190  
191  
192  
193  
194  
195  
196  
197  
198  
199  
200  
201  
202  
203  
204  
205  
206

**Figure 1: Genome-wide probing of intracellular SARS-CoV-2 RNA structure with DMS-MaPseq.**

**(A)** Schematic of the experimental protocol for probing viral RNA structures with DMS-MaPseq.

**(B)** Correlation of DMS reactivities for each base between two biological replicates.

**(C)** Genome-wide coverage as a function of position. Coverage at each position represents the average coverage over a 400 nt window.

**(D)** Signal and noise as a function of genome position for untreated and DMS-treated RNA. Signal (mutation rate for A and C) and noise (mutation rate for G and U) at each position was plotted as the average of 100 nt window. Mutational Fraction of 0.01 at a given position represents 1% of reads having a mismatch or deletion at that position.

We confirmed that DSCI measures data-structure agreement using two RNAs with well-defined structures that we had previously analyzed with DMS-MaPseq (Tomezsko *et al.*, 2020): the U4/U6 snRNA and the HIV Rev Response Element (RRE) (Figure 2B). U4/U6 in vitro had a DSCI of 0.978 relative to its crystal structure (Cornilescu *et al.*, 2016), while RRE in cells had a DSCI of 0.949. As negative controls, we randomly shuffled the reactivities of all of A and C residues 100 times and computed the DSCI for each permutation; for each RNA, the mean DSCI for shuffled reactivities was approximately 0.50, as expected for random data. Thus, DSCI accurately measures how well the structure model is supported by the data, with DSCI values of roughly 0.95 or greater indicating very strong support.

Our genome-wide structure model was well-supported by our chemical probing data, with a global DSCI of 0.891 (Figure 2B) and significantly greater reactivities of unpaired bases relative to paired bases ( $P < 0.0001$ , Mann-Whitney  $U$  test; Figure 2A). We note that two previously published in-cell genome-wide models agreed substantially less with their respective chemical probing datasets, with global DSCI values of 0.705 (Huston *et al.*, 2020) and 0.760 (Manfredonia *et al.*, 2020) (Supplementary Figure 2).

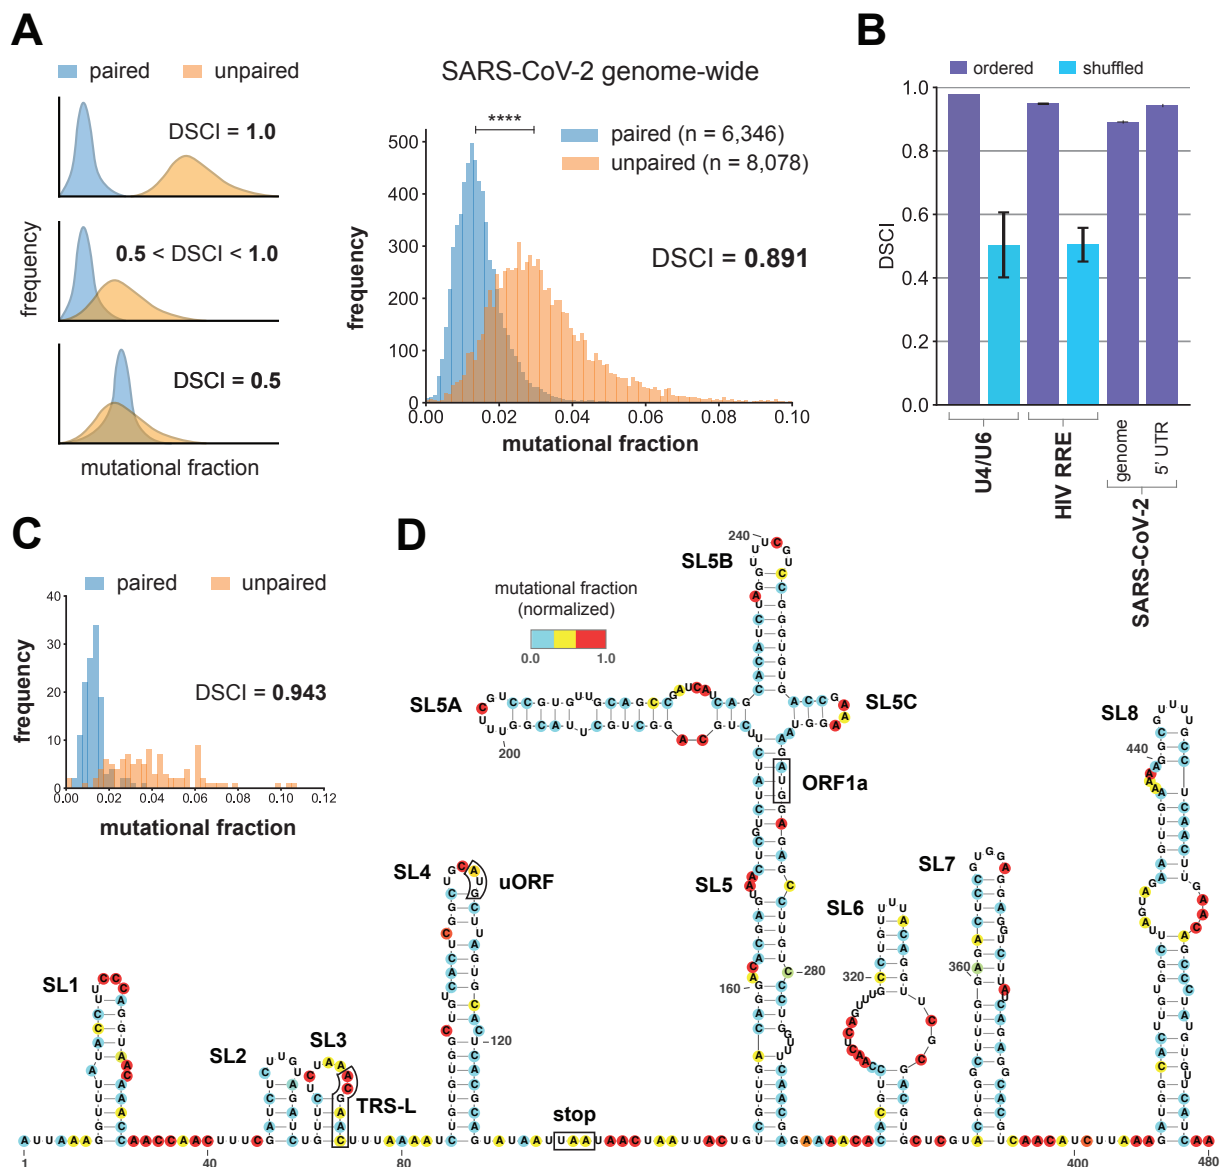

**Figure 2: Quality assessment of the SARS-CoV-2 secondary structure model genome-wide and of the 5' UTR.**

**(A)** (Left) Schematic of the data-structure correlation index (DSCI) showing possible distributions of signal on paired and unpaired bases for DSCI values of 1.0, 0.5, and intermediate. (Right) Distribution of signal on paired and unpaired bases genome-wide, and value of DSCI. The  $n = 55$  bases (0.38% of all 14,424 As and Cs) with mutational fractions  $>0.10$  are not shown for visual clarity, but are included in DSCI calculation. Horizontal bar indicates median values of paired and unpaired distributions, and \*\*\*\* indicates  $P < 0.0001$  (Mann-Whitney  $U$  test).

**(B)** DSCI values of control RNAs U4/U6 and HIV RRE, and of the whole SARS-CoV-2 genome and the 5' UTR. Error bars (if present) show standard deviations between replicates. Shuffled negative controls show the distribution of DSCI when the signals on A and C residues were shuffled randomly 100 times.

**(C)** Distribution of signal on paired and unpaired bases in the first 480 nt of the genome (structure in 1D), and value of DSCI.

**(D)** In-cell model of the first 480 nt of the genome, including the 5' UTR and sequences immediately downstream. Bases are colored by their DMS signal; bases that are not DMS reactive are colored white.

207  
208  
209  
210  
211  
212  
213  
214  
215  
216  
217  
218  
219  
220  
221  
222  
223  
224



225 Second, we found that our model of the 5' untranslated region (UTR) agreed well with  
226 previous studies, showing that we could accurately identify known secondary structures  
227 (Figure 2D). The secondary structures of the 5' UTR are conserved in multiple  
228 coronaviruses and have been characterized extensively (Yang and Leibowitz, 2015;  
229 Madhugiri *et al.*, 2018; Huston *et al.*, 2020; Manfredonia *et al.*, 2020; Miao *et al.*, 2020;  
230 Rangan, Zheludev and Das, 2020). In agreement with previous studies, we found five  
231 stem loops (SL1 – 5) within the 5' UTR (nucleotides 1 – 265). These structures perform  
232 essential functions in viral replication (SL1 (Li *et al.*, 2008) and SL2 (Liu *et al.*, 2007)),  
233 subgenomic RNA production (SL3 (Yang and Leibowitz, 2015) and SL4 (Yang *et al.*,  
234 2011)), and escape of nsp1-mediated translational suppression (SL1 (Banerjee *et al.*,  
235 2020)). SL5 contains the start codon of ORF1 and branches into three additional stems  
236 (SL5A, SL5B, SL5C), a complex structure that our model recapitulates perfectly with  
237 respect to previous studies (Huston *et al.*, 2020; Miao *et al.*, 2020).

238  
239 A short stem loop (SL4.5) has been proposed to occur between SL4 and SL5 (Huston *et al.*  
240 *et al.*, 2020; Miao *et al.*, 2020; Rangan, Zheludev and Das, 2020). Our data suggest that  
241 SL4.5 does not exist, in agreement with another model based on in-cell data  
242 (Manfredonia *et al.*, 2020). Additional structures exist immediately downstream of the 5'  
243 UTR. We found three stem loops (SL6 – 8) in this region, in nearly perfect agreement with  
244 two previous in-cell studies (Huston *et al.*, 2020; Manfredonia *et al.*, 2020). Further  
245 supporting the accuracy of our model, the DSCI was 0.943 across SL1 – 8, indicating  
246 that our model of this region agrees very well with our chemical probing data (Figure 2C).

247  
248  
249 **Genome structures that are well supported by multiple lines of evidence**

250 To identify structures within the genome that are well supported by multiple types of  
251 evidence, we compared several types of evidence.

252 We compared our structure to two other genome-wide models of the SARS-CoV-2  
253 genome structure in Vero E6 cells: Model 1 (Huston *et al.*, 2020) and Model 2  
254 (Manfredonia *et al.*, 2020). Relative to each other, the viral genomes in these three studies  
255 contain zero indels and mismatches at only seven positions. As a similarity metric, we  
256 introduce a modified version of the the Fowlkes-Mallows index (mFMI) that measures  
257 agreement of base pairs and unpaired bases (see Methods). Globally, our model was  
258 81.4% similar to Model 1 and 80.7% similar to Model 2, while Models 1 and 2 were  
259 76.4% similar.

260 To determine local similarity, we computed the mFMI across the genome using a sliding  
261 window of 80nt and a step size of 1nt (Supplementary Figure 3).

262 We evaluated the robustness of our in-cell data derived genome-wide model by varying  
263 two critical RNA folding parameters used by RNAstructure: 1) the maximum allowed  
264 distance for base pairing and 2) the threshold for DMS signal normalization.

265



266 A previous *in silico* approach for folding RNA found that limiting base pairs to be 100 to  
267 150 nt apart was optimal to avoid overpredicting structured regions (Lange *et al.*, 2012).  
268 However, some RNA viruses contain known essential structures wherein bases over 300  
269 nt apart are paired (e.g. the Rev response element in HIV-1 spans approximately 350 nt  
270 (Watts *et al.*, 2009)). We therefore varied the maximum distance (md) allowed for base  
271 pairing from 120 nt to 350 nt. We computed the agreement between the resulting  
272 structures using a modified version of the Fowlkes-Mallows index (Fowlkes and Mallows,  
273 1983) that compares base pairing partners as well as unpaired bases (Methods). Overall,  
274 there was high agreement while varying the md from 120 nt to 350 nt, suggesting that  
275 long-distance (i.e. >120 nt) interactions across the SARS-CoV-2 RNA have a small effect  
276 on the identity of local structures. The genome structure folded with an md of 120 nt was  
277 97.5% identical to the structure with an md of 350 nt, and in the latter structure only  
278 3.8% of base pairs spanned >120 nt. Next, we proceeded with the md limit of 350 nt  
279 and tested two different DMS signal thresholds that normalize reactivity to either the  
280 median of the top 5 % or top 10% of the most reactive bases. We found that the  
281 structure models produced with the two normalization approaches were highly similar,  
282 with 93.6% identity (Figure 3A). Thus, within the ranges that we tested, our genome-wide  
283 data-derived model was robust to variation in the parameters of RNAstructure (Mathews,  
284 2004).

285  
286 We proceeded with the whole genome structure modelled with a md of 350 nt and a  
287 DMS signal normalization of 5% for further analysis. Previous studies that  
288 computationally predicted genome-wide SARS-Cov-2 RNA structures used 1) RNAz, a  
289 thermodynamic-based model that additionally takes sequence alignment and considers  
290 base pairing conservation (Gruber *et al.*, 2010; Rangan, Zheludev and Das, 2020), and 2)  
291 Contrafold, which predicts RNA secondary structures without physics-based models  
292 and instead uses learned parameters based on known structures (Do, Woods and  
293 Batzoglou, 2006). These recent studies predicted 228 structures with RNAz with lengths  
294 ranging from 90 to 120 nt, and 79 structures with Contrafold with lengths ranging from  
295 55 to 111 nt (Rangan, Zheludev and Das, 2020). For each of these structures, we  
296 computed the agreement between the different models (Supplementary Figure 4B). We  
297 report the agreement using the mFMI while either excluding external bases pairs or  
298 including these pairs (Methods). As expected, agreement with the structures from purely  
299 computational prediction is higher when excluding external base pairs (average 76.3%  
300 for RNAz, 69.3% for Contrafold) than when including them (average 71.2% for RNAz,  
301 54.0% for Contrafold). Since our goal is to compare the overall similarity of two  
302 structures, we chose the inclusion of external base pairs as the more accurate metric for  
303 comparing the structures. Our predictions overall agreed more with those from RNAz  
304 (mean 71.2%, median 75.2%) than Contrafold (mean 54.0%, median 54.4%). We report  
305 the agreement between our structure and the RNAz structures across the entire genome  
306 (Figure 3C). Most structures are 60 to 80% identical, with several short regions that  
307 disagree substantially.

308  
309 In addition, we computed the similarity of our model compared to the structures with the  
310 three highest P-values predicted with RNAz that do not overlap known structures in the

311 Rfam database (Kalvari *et al.*, 2018; Rangan, Zheludev and Das, 2020) (Supplementary  
312 Figure 4D). We noted that in all three cases, the structure at the center of the window  
313 was nearly identical to ours, and most of the disagreements arose at the edges,  
314 presumably due to the effects of the windows from RNAz being limited to 120 nt. Of the  
315 five structures predicted with Contrafold that had the largest maximum expected  
316 accuracies, our agreement ranged from 66.0% to 86.1%, well above the genome-wide  
317 mean (54.0%), suggesting that these structures are indeed more accurate than the  
318 average Contrafold structure (Supplementary Figure 4E).

319  
320 Finally, we compared the structures at the TRS elements to those predicted by RNAz  
321 (Rangan, Zheludev and Das, 2020) (Supplementary Figure 4F). To remove the effects of  
322 external base pairs, we focused only on the complete structural element (e.g. a stem  
323 loop) in which the TRS was located. RNAz predicted structure for four TRSs. Our model  
324 for TRS-L was identical to the first predicted window from RNAz but differed significantly  
325 (35.3% agreement) from the next prediction of the same TRS-L element within a different  
326 folding window, indicating that the choice of folding window can have a large effect on  
327 the RNAz structure model. For the other three TRS elements for which RNAz predicted  
328 at least one structure for, our agreement ranges from 74.4% to 96.8%, above the  
329 genome-wide average of 71.2%, lending support to both models.

330  
331 To facilitate future studies investigating the binding of locked nucleic acid (LNA) probes  
332 to the genome, we determined the locations of all stretches of at least 14 consecutive  
333 unpaired bases in our genome-wide model (Supplementary Table 1). These 259 regions  
334 had a median length of 19 nt and a maximum length of 180 nt (at positions 21573 –  
335 21752). Due to formation of alternative structures (discussed below), some of these  
336 regions may sometimes form base pairs, but they appear to exist at least some of the  
337 time in an unfolded state.

338  
339

### 340 **Transcription-Regulating Sequences (TRSs) lie within stem loops**

341  
342 As the transcription-regulating sequences (TRSs) are necessary for the synthesis of  
343 sgRNAs, we analyzed our structural models of the leader TRS (TRS-L) and the nine body  
344 TRSs (TRS-B). The leader TRS (TRS-L) is the central component of the 5' UTR involved  
345 in discontinuous transcription (Sola *et al.*, 2015). *In silico* models for several alpha and  
346 betacoronaviruses variously place TRS-L in stem loop 3 (SL3) or in an unpaired stretch  
347 of nucleotides (Liu *et al.*, 2007; Yang and Leibowitz, 2015). The TRS-L of SARS-CoV and  
348 of SARS-CoV-2 was predicted to lie in the 3' side of the stem of SL3, which is consistent  
349 with our in-cell model (Liu *et al.*, 2007; Yang and Leibowitz, 2015; Rangan, Zheludev and  
350 Das, 2020). In our data, the stem of SL3 contains two bases with medium reactivity  
351 (Figure 2B), which suggests that SL3 transitions between folded and unfolded states, as  
352 is hypothesized for the alphacoronavirus transmissible gastroenteritis virus (TGEV)  
353 (Madhugiri *et al.*, 2018).

354

355 Of the nine body TRSs, we find that seven (all but the TRSs of ORF7a and ORF7b) lie  
356 within a stem loop. Of these, all but one TRS (N) place the core sequence on the 5' side  
357 of the stem. Four body TRSs (M, ORF6, ORF8, and N) are predicted to lie in stem loops  
358 with two or three bulges, with the core sequence spanning one of the internal bulges.  
359 The other three structured body TRSs (S, ORF3a, and E) lie in stem loops without bulges,  
360 with the final paired base in the 5' side of the stem contained in the core sequence.  
361 Strikingly, the entire core sequence is paired in two body TRSs (S and M), and partially  
362 exposed in a loop or bulge in the other five (Supplementary Figure 5B).

363  
364

### 365 **The vast majority of the SARS-CoV-2 genome forms alternative structures**

366

367 We previously discovered that for another ssRNA virus, HIV-1, over 90% of the genome  
368 forms ensembles of alternative structures rather than a single structure (Tomezsko *et al.*,  
369 2020). Formation of alternative RNA structures has important functional consequences:  
370 for example, in HIV-1, they regulate alternative splicing. However, all previous studies  
371 that chemically probed the entire SARS-CoV-2 genome (Huston *et al.*, 2020;  
372 Manfredonia *et al.*, 2020) used only the average reactivity of each base to fold their  
373 structural models, and thus could not detect subpopulations of RNAs with different  
374 structures. Although these studies used Shannon entropy to estimate structural  
375 heterogeneity in a series of short sliding windows, this metric is still based on the average  
376 SHAPE reactivities per base and does not identify subpopulations of alternative  
377 structures directly from single molecule data.

378

379 We detected alternative structures in SARS-CoV-2 by applying the DREEM algorithm  
380 (Tomezsko *et al.*, 2020) to our in-cell DMS-MaPseq data. Briefly, DREEM clusters the  
381 sequencing reads based on which bases are DMS modified together on the same read  
382 and identifies sub-populations of molecules with distinct patterns of DMS modifications.

383

384 We partitioned the genome into 373 regions of 80 nt and clustered the reads mapping  
385 to each segment. All 316 regions that passed our quality control criteria (see Methods)  
386 formed at least two clusters, providing the first experimental evidence that the vast  
387 majority (at least 84%) of the SARS-CoV-2 genome forms alternative structures.

388

389 We hypothesized that if a region forms two very different alternative structures, the local  
390 agreement between the DMS reactivity data and the population average model (i.e. the  
391 DSCI) would be low, and vice versa. We computed the DSCI across the entire genome  
392 in overlapping windows of 80 nt with a step size of 1 nt (excluding windows without at  
393 least 5 paired and 5 unpaired bases with DMS reactivities). To quantify differences  
394 between alternative structures, we computed for each base in the region the difference  
395 in DMS mutation rate (hereafter  $\Delta$ DMS) between the two clusters in each region (see  
396 Methods). In order to compare  $\Delta$ DMS (a property of a single base) with DSCI (a property  
397 of multiple bases), we computed the moving median  $\Delta$ DMS using the same sliding  
398 window as for DSCI (excluding windows with fewer than 10 bases with DMS reactivities).

399

400 Consistent with our hypothesis, DSCI and  $\Delta$ DMS correlated negatively ( $r = -0.330$ ,  $n =$   
401  $26704$ ,  $P < 0.0001$ ), albeit weakly, indicating that large differences between alternative  
402 structures are associated with lower agreement between the population average  
403 structure and the DMS reactivities (Supplementary Figure 6). In support of the quality of  
404 our genome-wide model based on population average, there were no low-quality regions  
405 with minimal alternative structure (low DSCI and low  $\Delta$ DMS). Surprisingly, many regions  
406 in the genome-wide model agreed well with the population average data, yet separated  
407 into clusters with large  $\Delta$ DMS (high DSCI, high  $\Delta$ DMS). For example, the region 14,561  
408 – 14,640 folds into a bulged stem loop that is extremely well supported by the DMS  
409 reactivities (DSCI = 0.997) but forms distinct clusters of reactivity patterns, as indicated  
410 by the moderate  $\Delta$ DMS of 0.105. We find that the reactivities of nucleotides in loops  
411 change considerably between the clusters, while the reactivities of nucleotides in stems  
412 change minimally. Thus, the set of nucleotides that are paired is mostly identical between  
413 the two clusters, while other factors cause changes in the reactivities of the nucleotides  
414 in loops, such as possibly changes in tertiary structure or transient formation of long-  
415 range RNA-RNA interactions. This finding indicates that predicted structures that agree  
416 strongly with the population average data are likely to be accurate, even if the data  
417 separate into distinct clusters due to changes in reactivities within loops.

418  
419 In order to identify regions of the genome that did not correspond well to the population  
420 average model (low DSCI) and could be improved by clustering (high  $\Delta$ DMS), we located  
421 all regions where the DSCI and  $\Delta$ DMS were, respectively, below and above their  
422 genome-wide medians of 0.902 and 0.117 (Figure 3). For example, the genome-wide  
423 minimum DSCI (0.457) falls within the clustered region 14,881 – 14,960 and coincides  
424 with a peak in  $\Delta$ DMS. We find that this region clusters into two distinct structural states:  
425 the major cluster (~80%) has an even distribution of DMS signal, suggesting unfolded or  
426 highly dynamic state; while the minor cluster (~20%) has an uneven distribution of DMS  
427 signal, suggesting a structured state. The structured state contains a stem loop spanning  
428 the same nucleotides (14,883 – 14,930) as a stem loop in the population average model,  
429 but the distal portion is considerably different and is much more consistent with the DMS  
430 reactivities of the structured state than the population average model is with the average  
431 reactivities. Thus, we find that clustering can identify secondary structures better  
432 supported by chemical probing data in regions where the population average model fails  
433 to generate a well-supported structure.

434  
435 Interestingly, we find that the frameshift stimulating element (FSE), which is critical for  
436 regulating the translation of ORF1b, also has a structure that is poorly supported by the  
437 population average DMS reactivities and a large difference between clusters (Figure 3),  
438 suggesting that this region also forms multiple distinct structures. Although other studies  
439 have suggested that the FSE forms multiple structures, they have either inferred them  
440 indirectly using suboptimal folding based on population average reactivities (Huston *et*  
441 *al.*, 2020) or measured them in short segments of the FSE *in vitro*, outside of the context  
442 of genomic RNA and cellular factors (Neupane *et al.*, 2020). We find that the FSE indeed  
443 forms at least two distinct structures and characterize them in detail below.

444

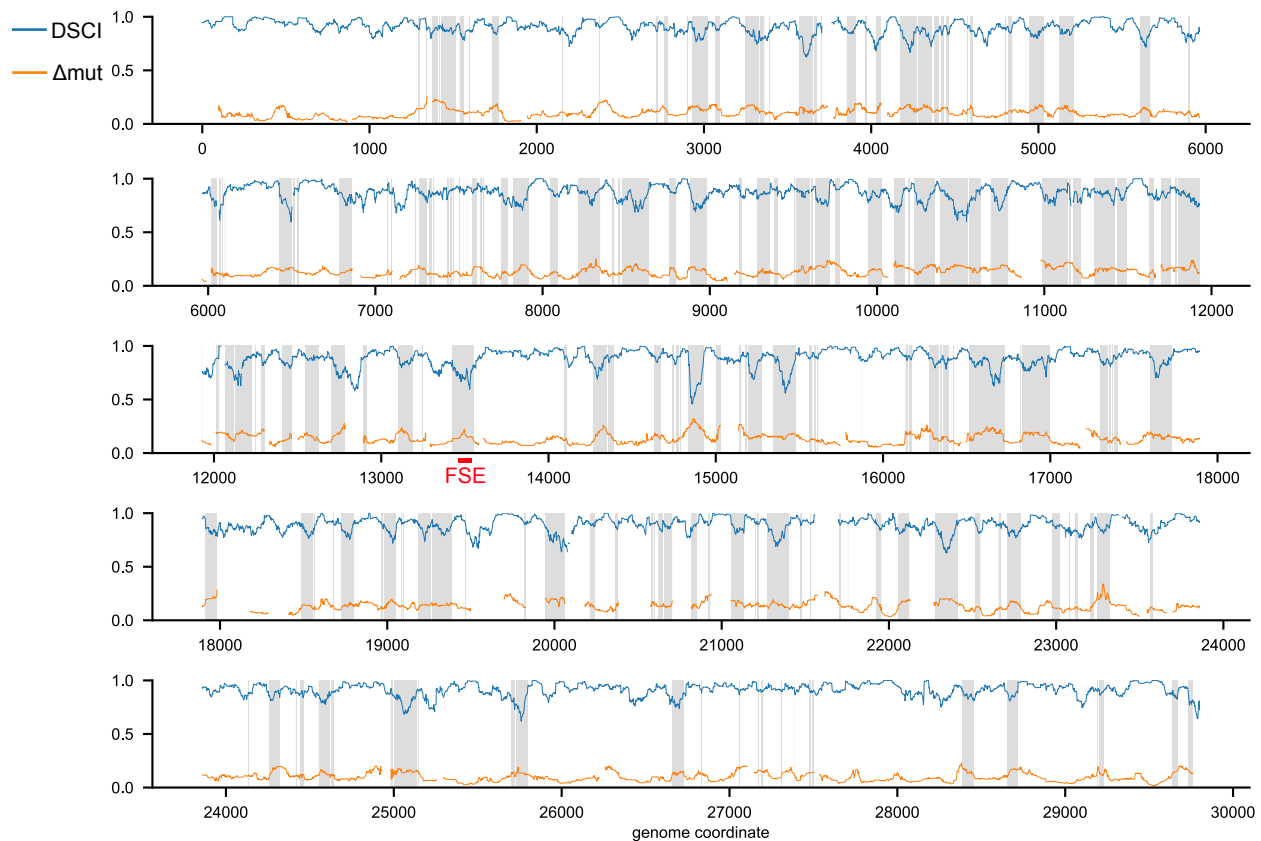

445  
446

### 447 **Figure 3: Genome-wide data-structure correlation index (DSCI) and inter-cluster change in DMS** 448 **reactivity ( $\Delta$ DMS)**

449 DSCI is computed for all overlapping 80nt windows genome-wide, except windows with fewer than 5  
450 unpaired and 5 paired bases.  $\Delta$ DMS is computed as the moving median for all overlapping 80nt windows  
451 containing at least 10 bases with DMS reactivities, after removing cluster regions with fewer than 100,000  
452 reads or one cluster with a DMS reactivity greater than 0.3. Regions where clustering is likely to improve  
453 structure predictions over the population average model (with  $DSCI < 0.902$  and  $\Delta DMS > 0.117$ ) are  
454 shaded in gray. The location of the frameshift stimulating element (FSE) is highlighted in red.

455

456

### 457 **Uncovering an unexpected structure at Frameshift stimulating element (FSE)**

458

459 The frameshift stimulating element (FSE) causes the ribosome to slip and shift register  
460 by -1 nt in order to bypass a stop codon and translate ORF1b, which encodes five non-  
461 structural proteins (nsps) including nsp12, an RNA-dependent RNA polymerase (RdRP)  
462 (Plant and Dinman, 2008). Previous studies on coronaviruses and other viruses have  
463 shown that an optimal frameshifting rate is critical and small differences in percentage  
464 of frameshifting lead to dramatic differences in genomic RNA production and infection  
465 dose (Plant *et al.*, 2010). Therefore, the FSE has emerged as a major drug target for small  
466 molecule binding that could influence the rate of frameshifting and be used as a  
467 treatment against SARS-CoV-2. To date, there is little experimental data on the structure  
468 of SARS-CoV-2 FSE and the prevailing model is a 3-stem pseudoknot forming



469 downstream of the slippery site, which is thought to pause the ribosome and allow  
470 frameshifting to occur (Plant and Dinman, 2008).

471  
472 To closely examine the FSE structure in cells, we used DMS-MaPseq target specific  
473 protocol (Zubradt *et al.*, 2016). We designed primers targeting 283 nt surrounding the  
474 FSE and amplified this region from cells infected with SARS-CoV-2 that were treated  
475 with DMS. Our analysis revealed a strikingly different structure than the prevailing model  
476 (Plant *et al.*, 2005; Rangan, Zheludev and Das, 2020) (Figure 4A). Our in-cell model does  
477 not include the expected pseudoknot formation downstream of the slippery sequence.  
478 Instead, half of the canonical stem 1 (Figure 4A, purple) finds an alternative pairing  
479 partner (pink) driven by 10 complementary bases upstream of the slippery site (Figure  
480 4A, pink). We call this pairing Alternative Stem 1 (AS1).

481  
482 The prevailing model of the SARS-CoV-2 FSE is based on previous studies of the SARS-  
483 CoV FSE, as they only differ in sequence by a single nucleotide located in a putative loop  
484 (Rangan, Zheludev and Das, 2020). Nuclease mapping and Nuclear Magnetic  
485 Resonance (NMR) analysis of the SARS-CoV FSE solved the structure of an *in vitro*  
486 refolded, truncated 85 nt region starting at the slippery site (Plant *et al.*, 2005). This  
487 structure did not include the sequence upstream of the slippery site and formed a 3-  
488 stem pseudoknot.

489  
490 Interestingly, *in silico* predictions of the RNA structure of the SARS-CoV-2 genome using  
491 RNAz (Rangan, Zheludev and Das, 2020) and ScanFold (Andrews *et al.*, 2020) do not  
492 find the 3-stem pseudoknot but instead support our in-cell model of Alternative Stem 1.  
493 In SARS-CoV-2, ScanFold not only predicted the AS1 but also found that it was more  
494 stable relative to random sequences than any other structure in the entire frameshift  
495 stimulating element (Andrews *et al.*, 2020). Indeed, three conceptually varied methods  
496 (DMS-MaPseq, RNAz, and ScanFold) aimed at identifying functional structures, run  
497 independently by different research groups all converge on the Alternative Stem 1 as a  
498 central structure at the FSE.

499  
500 In order to directly compare our in-cell findings with the reports of the 3-stem  
501 pseudoknot, we *in vitro*-transcribed, refolded, and DMS-probed the same 92 nt  
502 sequence as analyzed by NMR (Plant *et al.*, 2005). Our in vitro-data driven model for the  
503 major cluster agrees well with the NMR model (87.1% identical) and finds all three  
504 canonical stems, including the pseudoknot.

505



**A**

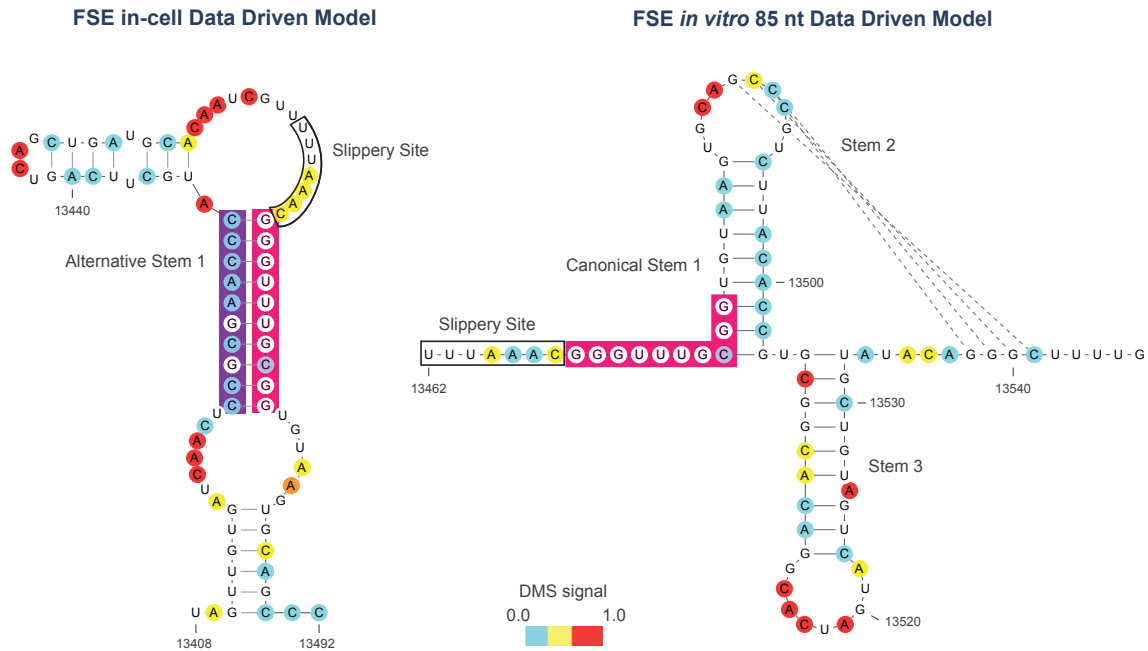

**B**

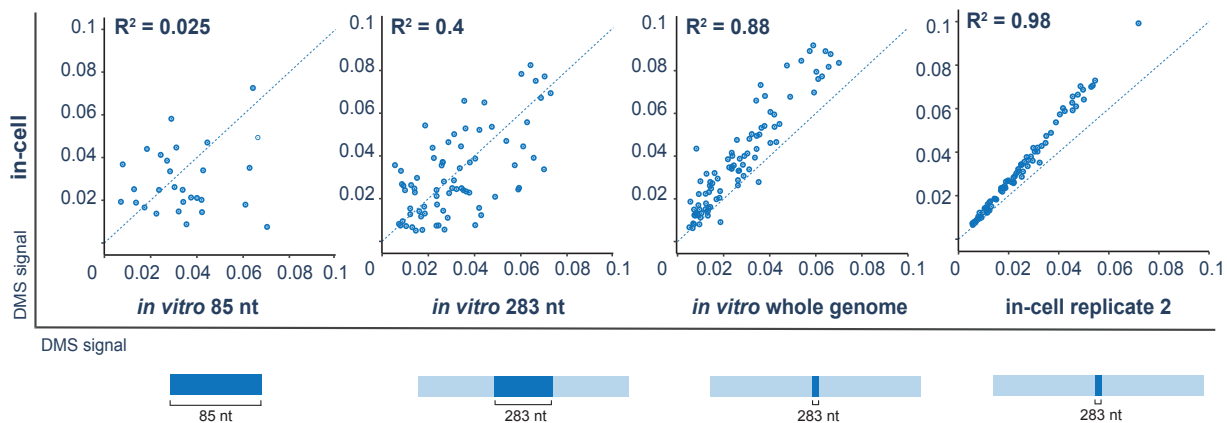

**C**

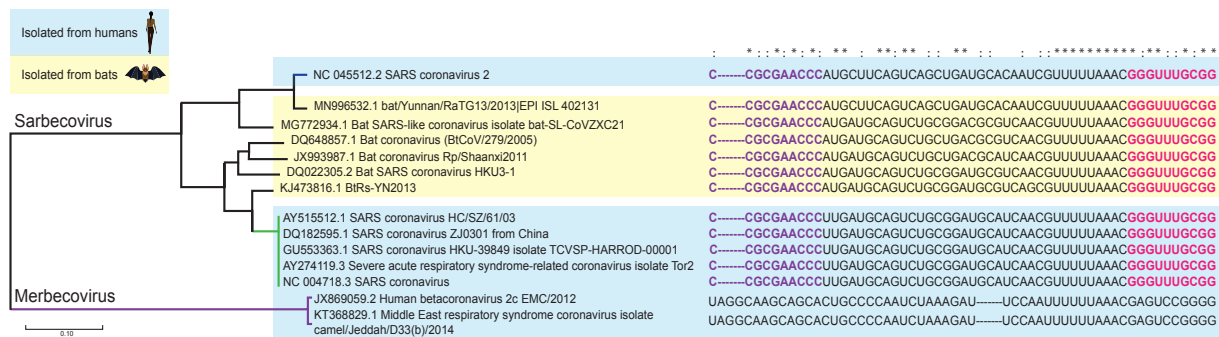

506  
507  
508  
509  
510

511 **Figure 4: Frameshift stimulating element (FSE) adopts an unexpected structure in cells**  
512 **(A)** Structural model of FSE derived from DMS-MaPseq from (left) infected VERO cells and (right) *in vitro*-  
513 transcribed RNA. Nucleotides are color-coded by normalized DMS signal. The 5' of the canonical stem 1  
514 is highlighted in pink, the complement pairing (starting 46nt downstream) is shown in purple and the  
515 slippery site boxed in white. Structural model of *in vitro*-transcribed 85 nt FSE shown is the major cluster  
516 structure from DREEM clustering.  
517 **(B)** Scatter plots comparing FSE structures in different contexts. Comparison of DMS signals of in-cell  
518 replicate 1 with (leftmost) *in vitro* refolded 85 nt., (middle-left) *in vitro* refolded 283 nt., (middle-right) *in vitro*  
519 refolded whole genome, and (rightmost) in-cell replicate 2. The blue dotted line is the identity line; R is  
520 Pearson's coefficient.  
521 **(C)** Sequence conservation of FSE alternative pairing. The 5' sequence of canonical stem 1 is highlighted  
522 in pink and the complement sequence is highlighted in purple. Symbols above the sequences indicate  
523 perfect conservation among all viruses in the alignment (\*) or perfect conservation among only the  
524 sarbecoviruses (:).  
525  
526

## 527 **FSE structure is dependent on the sequence context**

528  
529 The major differences we observed in the structure of the FSE in cells vs. *in vitro* could  
530 either be due to 1) length of the *in vitro* refolded viral RNA or 2) factors in the cellular  
531 environment that are absent *in vitro*. To distinguish between these two possibilities, we  
532 re-folded the FSE in the context of longer native sequences.  
533

534 We found that as we increased the length of the *in vitro* re-folded construct by including  
535 more of its native sequence, from 92 nt to 283 nt to 30 kb, the DMS reactivity patterns  
536 became progressively more similar to the pattern we observed in cells (Figure 4B).  
537 Indeed, in the context of the full ~30 kb genomic RNA, the structure of the FSE is nearly  
538 identical to the structure in physiological conditions during SARS-CoV-2 infection in cells  
539 ( $R^2 = 0.88$ ). These results indicate that the length of the entire RNA molecule is important  
540 for correctly folding the FSE. Strikingly, at a length of 283 nt and above, the main  
541 structure forming is Alternative Stem 1 rather than the 3-stem pseudoknot. Our data  
542 indicate that given the full range of pairing possibilities in the genome, AS1 is more  
543 favorable and the predominant structure in cells.  
544  
545

## 546 **Alternative Stem 1 pairing sequence is conserved across sarbecoviruses**

547  
548 To determine if other coronaviruses may have a similar alternative structure of the  
549 frameshift stimulating element, we searched for the sequence that pairs with canonical  
550 stem 1 in a set of curated coronaviruses (Ceraolo and Giorgi, 2020). This set contains 53  
551 isolates of SARS-CoV-2, 12 other sarbecoviruses (including the SARS-CoV reference  
552 genome), and 2 merbecoviruses. The 10 nt complement (CCGCGAACCC) to a sequence  
553 overlapping canonical stem 1 of the FSE (GGGUUUGCGG) was perfectly conserved in  
554 all 12 of the sarbecoviruses, six of which were isolated from bats (Figure 4C). However,  
555 the 10 nt complement was not present in either merbecovirus. Aligning the sequences  
556 of all 20 betacoronaviruses with complete genomes in RefSeq revealed that the 10 nt  
557 complement was conserved in all of and only the three sarbecoviruses in RefSeq: SARS-

558 CoV, SARS-CoV-2, and BtCoV BM48-31 (data not shown). These results suggest that  
559 AS1 is unique to the sarbecoviruses.

560

561

### 562 **The Frameshift stimulating element (FSE) forms alternative structures in cells**

563

564 We further analyzed the intracellular folding of the FSE using DREEM. We found two  
565 distinct patterns of DMS reactivities (Figure 5A), showing that the RNA folds into at least  
566 two distinct conformations at this region. In both biological replicates, Clusters 1 and 2  
567 separate at a reproducible ratio (~54% vs. 46%) where Cluster 1 is drastically different  
568 from Cluster 2 ( $R^2 = 0.25$ ) but identical to the corresponding cluster in biological  
569 replicates ( $R^2 = 0.99$ ) (Figure 5B). Both structures have the Alternative Stem 1 pairing  
570 spanning the slippery sequence. As the pseudo-energy constrains for the DMS signal  
571 did not generate alternative structure models with high DSCI scores, we color coded the  
572 dynamic bases that change DMS signal between the two conformations onto the  
573 population average model (green and yellow, Figure 5B). Together with our *in vitro*  
574 results, which revealed that the folding at the FSE is influenced by the longer sequence  
575 context (Figure 4B), this data implies that the alternative conformations are driven by  
576 long-distance RNA:RNA interactions.

577

**A**

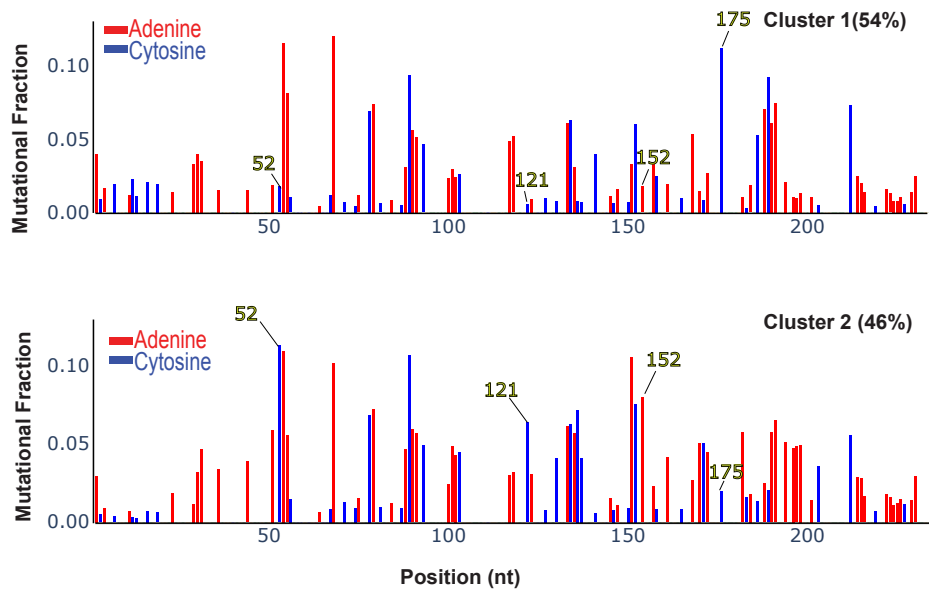

**B**

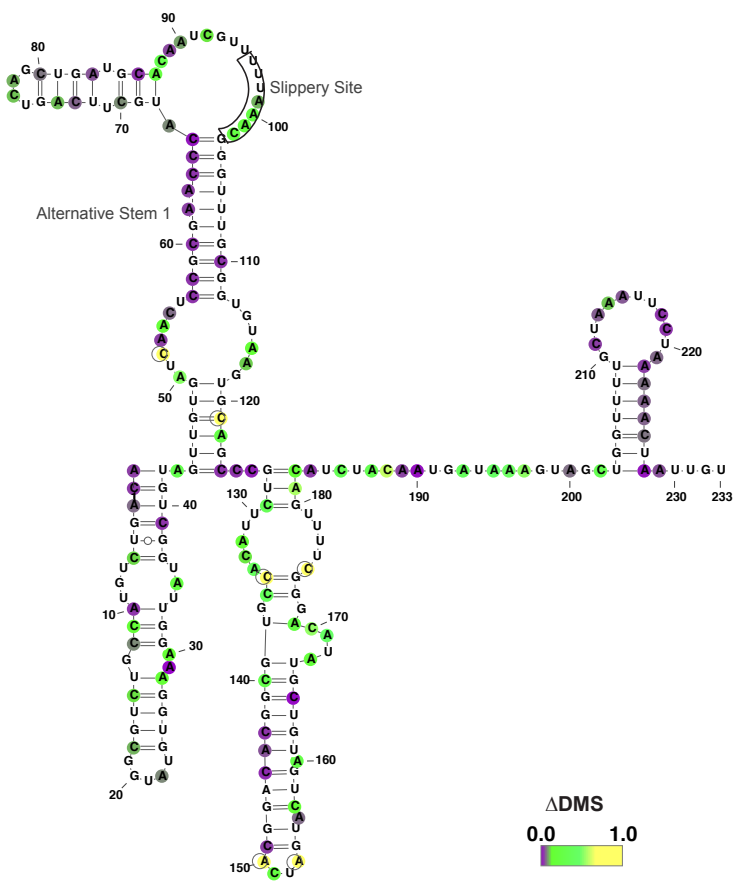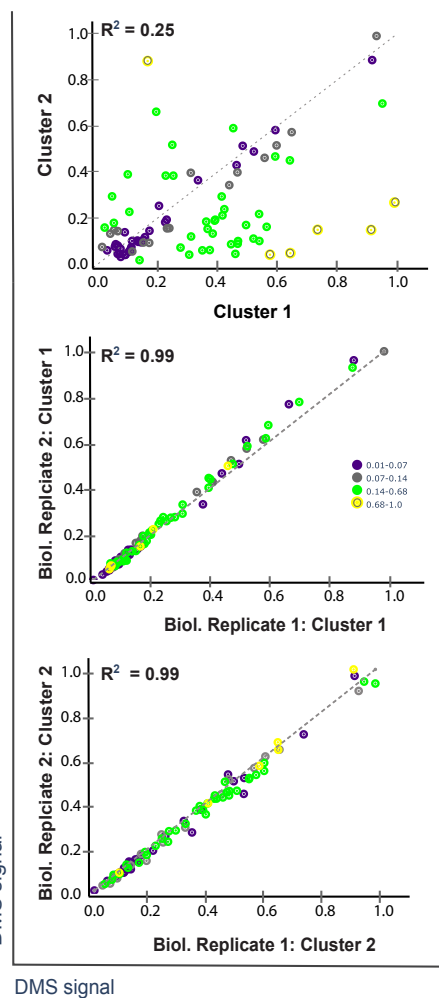

578  
579  
580  
581

582 **Figure 5: Alternative conformations of the frameshift stimulating element (FSE) derived from in-cell**  
583 **DMS-MaPseq data.**

584 **(A)** Clustered DMS signal for 283 nt surrounding the FSE structure from infected Vero cells, identified by  
585 DREEM clustering. Percentages for each cluster are determined by DREEM from representative sample  
586 of  $n = 2$ .

587 **(B)** RNA structure dynamics of the FSE. (Left) Population average structure of the FSE. Alternative stem 1  
588 and slippery site sequences are marked. Nucleotides are colored by change in DMS reactivity ( $\Delta$ DMS).  
589 The same colors are used on the (Right) scatterplots showing the comparison of DMS signal between  
590 clusters; (Top) scatter plots of DMS signal between cluster 1 and 2 within a biological replicate; (Middle,  
591 Bottom) scatter plot of the variation in DMS signal for the same cluster between two biological replicates.  
592 The dotted line is the identity line; R is Pearson's coefficient. The  $\Delta$ DMS is the normalized distance of each  
593 point (i.e. nucleotide) to the identity line.

594

595

596 **Frameshifting rate is determined by FSE sequence context and structure**

597

598 To directly measure how the FSE structure ensemble impacts frameshifting rate in cells,  
599 we constructed dual luciferase frameshift reporter constructs (Grentzmann *et al.*, 1998)  
600 with either a “short” FSE of only the 92nt region that folds into the canonical three-  
601 stemmed pseudoknot or a “long” FSE of the pseudoknot placed in the middle of  
602 approximately 3000nt of its native sequence context (Fig. 4a). The dual luciferase  
603 reporter is a well-established tool for measuring frameshifting rate, where the stop codon  
604 of a firefly luciferase (F-Luc) coding sequence is replaced with a FSE which allows a  
605 renilla luciferase (R-Luc) coding sequence in the -1 frame behind the FSE to report on  
606 frameshifting rate (Figure 6A). In addition, we *in vitro*-transcribed and transfected the  
607 reporter mRNA into cells to avoid cryptic transcription start sites or unintended splicing  
608 events of the DNA reporter that could impact F-Luc and R-Luc luminescence (Figure  
609 6B). We calculated the frameshifting rate as the relative R-Luc to F-Luc ratio after  
610 normalization against negative and positive controls.

611

612 Previous studies using similar constructs have focused on just the short FSE and found  
613 that it promotes ~20% frameshifting (Kelly *et al.*, 2020; Sun *et al.*, 2020). Strikingly, we  
614 found that the long FSE frameshifted at ~40% while the short FSE frameshifted at only  
615 ~17% (Figure 6C). Our results on the long FSE are in agreement with *in vivo* ribosome  
616 profiling measurements of SARS-CoV-2 infected cells (Finkel *et al.*, 2021) (Figure 6C),  
617 indicating that the previously predicted structure of the canonical 92nt FSE does not  
618 recapitulate the mechanism of ribosomal frameshifting on the full-length virus during  
619 infection. Although additional studies are needed to understand the precise nature of the  
620 interactions between sequences further up and downstream in ORF1a and ORF1b that  
621 impact both the FSE structure ensemble and frameshifting rate (Figure 6D), our results  
622 underscore the importance of probing RNA secondary structure in cells and in its full-  
623 length context.

624

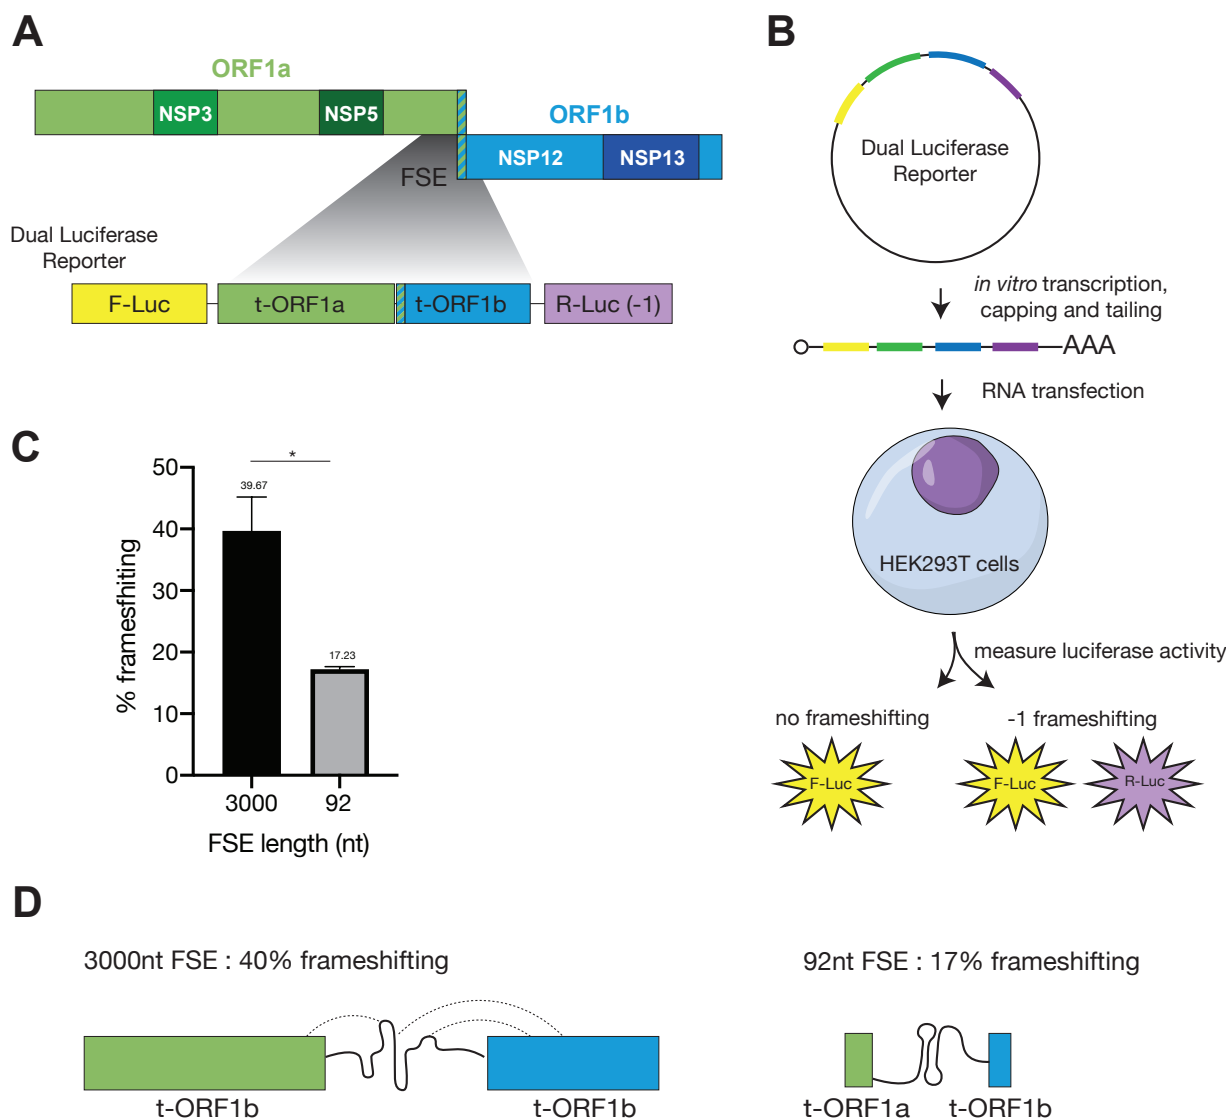

**Figure 6: The long FSE element has dramatically higher frameshifting rate than the minimal FSE.**

**(A)** Schematic the long FSE. Truncated orf1ab (t-orf1ab) is inserted into a dual luciferase -1 frameshifting reporter.

**(B)** The luciferase construct is in vitro transcribed, capped, tailed and transfected into HEK293T cells for 24h before measuring luciferase activity. No frameshifting results in only firefly luciferase (F-Luc) luminescence and -1 frameshifting results in F-Luc and Renilla luciferase (R-Luc) luminescence.

**(C)** % frameshifting calculated as R-Luc/F-Luc % normalized against amino-acid matched positive control and negative control for both 92- and 3000nt FSE for n=3, p<0.05; \*, unpaired t tests.

**(D)** Schematic of RNA structure ensemble leading to higher frameshifting rate.

## Discussion

Here, we present the first insights into the secondary structure ensembles of the entire SARS-CoV-2 RNA genome in infected cells based on chemical probing with DMS-MaPseq. Previous work on the RNA structures of SARS-CoV-2 have provided only



643 population-average models, which assume that the RNA folds into one conformation. In  
644 addition to our population-average model, we used the clustering algorithm DREEM  
645 (Tomezsko et al., 2020), and quantitatively detected alternative structures across the  
646 genome and revealed novel conformations at critical positions such as the frameshifting  
647 element (FSE).

648  
649 Our DMS-MaPseq/DREEM framework gives the highest reproducibility data and  
650 agreement between the data and the predicted structure models, compared to all other  
651 chemical probing work on SARS-CoV-2 genome to date (Supplementary Figure 4).  
652 Importantly, our framework is the only approach that allows detecting RNA structure  
653 heterogeneity directly from the data itself, without any prior assumptions or  
654 thermodynamic and statistical modeling of RNA folding. We have previously  
655 benchmarked and validated DMS-MaPseq/DREEM on gold standard structures  
656 (Tomezsko *et al.*, 2020), and now we generate a secondary structure model for the entire  
657 SARS-CoV-2 genomic RNA, highlighting regions that are similar to well-folded RNAs as  
658 well as regions that are highly heterogeneous in folding.

659  
660 Our in-cell data reveal alternative conformations for the frameshift element (FSE) within  
661 its genomic sequence context distinct from the canonical pseudoknot seen when  
662 considering only the 92nt FSE. We show that *in vitro* RNA-refolding of the full-length 30  
663 kb genome can recapitulate the structure ensemble formed at the FSE in cells.  
664 Importantly, we show that the longer sequence is critical to achieve the frameshifting  
665 rate observed in cells during viral infection. When used in dual luciferase reporters, the  
666 longer sequence (3kb) frameshifts at much higher rate than the minimal FSE (~40%  
667 compared to ~20% of the minimal sequence). These results underscore a functional role  
668 for long range RNA interactions (Ziv *et al.*, 2020) and explain data from recent ribosome  
669 profiling studies showing that the ribosomes frameshifts at ~50% in infected cells (Puray-  
670 Chavez *et al.*, 2020; Finkel *et al.*, 2021).

671  
672 Our in-cell data-derived model of SARS-CoV-2 presents major RNA structures and sites  
673 of RNA structure heterogeneity across the entire genome and provides the foundation  
674 for further studies. Importantly, our work reveals that drugs such as small molecules or  
675 anti-sense oligoes intended to abolish SARS-CoV-2 frameshifting should be designed  
676 and tested against the correct structure ensemble that forms in cells. Further work to  
677 better understand of the functional significance of other structured elements across  
678 SARS-CoV-2 genome will enable the design of more targeted therapeutics.

679 **Acknowledgments**

680

681 The SARS-CoV-2 starting material was provided by the World Reference Center for  
682 Emerging Viruses and Arboviruses (WRCEVA), with Natalie Thornburg (nax3@cdc.gov)  
683 as the CDC Principal Investigator.” We thank T.B. Faust for manuscript input and E.  
684 Smith for illustrator images. This work was supported by The Pershing Square  
685 Foundation, The Office of Naval Research Award # N00014-20-1-2084, and the  
686 Burroughs Wellcome fund.

687

688 **Author Contributions**

689

690 T.C.T.L. and S.R. conceived and designed the project. T.C.T.L. carried out all  
691 experiments with collaborative contributions from L.E.M. and A.G. M.F.A., T.C.T.L., S.K.,  
692 S.S.Y.N. and S.R. performed the data analysis. J.G. and Y.S. performed the reporter  
693 frameshifting assays. T.C.T.L., M.F.A., and S.R. interpreted the results and wrote the  
694 paper with input from S.K., S.S.Y.N., L.E.M, M.B., and A.G.

695

696 **Declaration of Interests**

697 The authors declare no competing interest

698 **Methods**

699

700 **RESOURCE AVAILABILITY**

701

702 **Lead Contact**

703 Further information and requests for resources and reagents should be directed to and  
704 will be fulfilled by the Lead Contact, S. Rouskin (srouskin@wi.mit.edu)

705

706 **Materials Availability**

707 This study did not generate new unique reagents.

708

709 **Data and Code Availability**

710 The source code for the data processing and analyses is available at  
711 <http://dreem.wi.mit.edu/static/dreem.zip> and

712 [http://dreem.wi.mit.edu/static/DREEM\\_Manual.pdf](http://dreem.wi.mit.edu/static/DREEM_Manual.pdf)

713

714 The sequencing data are deposited into NCBI Gene Expression Omnibus (GEO),  
715 (accession number pending).

716

717 **EXPERIMENTAL MODEL AND SUBJECT DETAILS**

718

719 SARS-CoV-2 total viral RNA was extracted from Vero cells (ATCC CCL-81) cultured in  
720 DMEM (Gibco) supplemented with 10% FBS (Gibco) plated into 100 mm dishes and  
721 infected at a MOI of 0.01 with 2019-nCoV/USA-WA1/2020 (Passage 6). Infected cells  
722 were incubated at 37 °C, 5% CO<sub>2</sub> and harvested 2 days post infection either with or  
723 without DMS treatment. Infected cell pellets were centrifuged at 5000xg for 5 min at 4  
724 °C and resuspended in Trizol (Ambion).

725

726 **METHOD DETAILS**

727

728 **DMS modification of SARS-CoV-2 RNA in infected cells**

729

730 200 µl DMS (or 2% v/v) was added dropwise to the plated Vero cells 48 h post SARS-  
731 CoV-2 infection and incubated for 4 min at 37°C. DMS was neutralized by adding 15 ml  
732 PBS (ThermoFisher Scientific) with 30% β-mercaptoethanol. The cells were centrifuged  
733 at 1,000g for 5 min at 4°C. The cells were washed twice by resuspending the pellet with  
734 15 ml PBS with 30% β-mercaptoethanol and centrifugation to pellet then just once with  
735 15 ml PBS. After washes, the pellet was resuspended in 1 ml Trizol (ThermoFisher  
736 Scientific) and RNA was extracted following the manufacturer's specifications. Total  
737 RNA was purified using RNA Clean and Concentrator -25 kit (Zymo).

738

739 **DMS modification of *in vitro*-transcribed RNA**

740

741 gBlocks were obtained from IDT for the SARS-CoV-2 92nt and 283nt FSE which  
742 corresponds to nucleotides 13460-13546 and nucleotides 13,342-13,624 based on

743 2019-nCoV/USA-WA1/2020. The regions of interest were amplified by PCR with a  
744 forward primer that contained the T7 promoter sequence  
745 (TAATACGACTCACTATAGGGTT). The PCR product was used for T7 Megascript *in vitro*  
746 transcription (ThermoFisher Scientific) according to manufacturer's instructions with a  
747 16 h incubation time at 37 °C. Subsequently, 1 µl Turbo DNase I (ThermoFisher Scientific)  
748 was added to the reaction and incubated at 37°C for 15 min. The RNA was purified using  
749 RNA Clean and Concentrator -5 kit (Zymo). 10 µg of RNA in 10 µl H<sub>2</sub>O was denatured at  
750 95°C for 1 min then placed on ice. On the basis of the DMS concentration used in the  
751 next step, 300 mM sodium cacodylate buffer (Electron Microscopy Sciences) with 6 mM  
752 MgCl<sub>2</sub>+ (refolding buffer) was added so that the final volume was 100 µl. (e.g. for 2.5%  
753 final DMS concentration: add 87.5 µl refolding buffer and 2.5 µl DMS) Then, 2.5 µl was  
754 added and incubated at 37°C for 5 min while shaking at 500 r.p.m. on a thermomixer.  
755 The DMS was neutralized by adding 60 µl β-mercaptoethanol (Millipore-Sigma). The RNA  
756 was purified using RNA Clean and Concentrator -5 kit.

757

### 758 **DMS modification of full-length SARS-CoV-2 RNA *in vitro***

759

760 Full-length SARS-CoV-2 RNA was extracted from the supernatant of infected Vero cells  
761 (as described above), resuspended in 1 ml Trizol (ThermoFisher Scientific) and RNA was  
762 extracted following the manufacturer's specifications. The RNA was purified using RNA  
763 Clean and Concentrator -5 kit (Zymo) and DMS modified as described above.

764

### 765 **Human rRNA subtraction of total cellular RNA**

766

767 15 µg of total RNA per reaction was used as the input for rRNA subtraction. First, 1 µl  
768 rRNA subtraction mix (15 µg/µl) and 2 µl 5× hybridization buffer (end concentration: 200  
769 mM NaCl, 100 mM Tris-HCl, pH 7.4) were added to each reaction, and final volume was  
770 then adjusted with water to 10 µl. The samples were denatured at 95°C for 2 min and  
771 then temperature was reduced by 0.1°C/s until the reaction was at 45°C. Next, 10 µl  
772 RNase H buffer and 2 µl hybridase thermostable RNase H (Lucigen) preheated to 45°  
773 were added. The samples were incubated at 45°C for 30 min. The RNA was cleaned with  
774 RNA Clean and Concentrator -5, following the manufacturer's instructions and eluted in  
775 45 µl water. Then, 5 µl Turbo DNase buffer and 3 µl Turbo DNase (ThermoFisher  
776 Scientific) were added to each reaction and incubated for 30 min at 37°C. The RNA was  
777 purified with RNA Clean and Concentrator -5 (Zymo) following instructions.

778

### 779 **RT-PCR and sequencing of DMS-modified RNA**

780

781 For reverse transcription, 1.5 µg of rRNA subtracted total RNA or 10 µg of *in vitro*-  
782 transcribed RNA was added to 4 µl 5× first strand buffer (ThermoFisher Scientific), 1 µl  
783 10µM reverse primer, 1 µl dNTP, 1 µl 0.1M DTT, 1 µl RNaseOUT and 1 µl TGIRT-III  
784 (Ingex). The reverse-transcription reaction was incubated at 60°C for 1.5 h. 1 µl 4M NaOH  
785 was then added and incubated at 95°C for 3 min to degrade the RNA. The cDNA was  
786 purified with Oligo Clean and Concentrator -5 (Zymo) following instructions. PCR  
787 amplification was done using Advantage HF 2 DNA polymerase (Takara) for 30 cycles

788 according to the manufacturer's specifications. The PCR product was purified by DNA  
789 Clean and Concentrator -5 (Zymo) following manufacturer's instructions. RNA-seq  
790 library for 150 bp insert size was constructed following the manufacturer's instruction  
791 (NEBNext Ultra™ II DNA Library Prep Kit). The library was loaded on ISEQ-100  
792 Sequencing flow cell with ISEQ-100 High-throughput Sequencing Kit and the library was  
793 run on ISEQ-100 (paired-end run, 151 x 151 cycles).

794

### 795 **Library generation with DMS-modified SARS-CoV-2 RNA**

796

797 After rRNA subtraction (described above), extracted DMS-modified RNA from SARS-  
798 CoV-2 infected Vero cells was fragmented using the RNA Fragmentation kit  
799 (ThermoFisher Scientific). 1.5 µg of rRNA subtracted total RNA was fragmented at 70°C  
800 for 2.5 min. The fragmented RNA was mixed with an equal volume 2× Novex TBE-urea  
801 sample buffer (ThermoFisher Scientific) and run on a 10% TBE-urea gel (ThermoFisher  
802 Scientific) at 200V for 1 h 15 min for size selection of RNA that is ~150nt. To  
803 dephosphorylate and repair the ends of randomly fragmented RNA, 2 µl 10× CutSmart  
804 buffer (New England Biolabs), 10 µl shrimp alkaline phosphatase (New England Biolabs),  
805 2 µl RNaseOUT (ThermoFisher Scientific) and water were added to a final volume of 20  
806 µl and 37°C for 1 h. Next, 4 µl 50% PEG-800 (New England Biolabs), 4 µl 10× T4 RNA  
807 ligase buffer (New England Biolabs), 4 µl T4 RNA ligase, truncated KQ (England Biolabs)  
808 and 2 µl linker were added to the reaction and incubated for 18 h at 22°C. The RNA was  
809 purified with RNA Clean and Concentrator -5, following the manufacturer's instructions  
810 for recovery of all fragments and eluted in 10 µl water. Excess linker was degraded by  
811 adding 2 µl 10× RecJ buffer (Lucigen), 1 µl RecJ exonuclease (Lucigen), 1 µl 5'  
812 deadenylase (New England Biolabs) and 1 µl RNaseOUT, then incubating for 1 h at 30°C.  
813 The RNA was purified with RNA Clean and Concentrator -5, following the manufacturer's  
814 instructions and eluted in 11 µl water.

815

816 For reverse transcription, 1.5 µg of rRNA subtracted total RNA or 10 µg of in vitro-  
817 transcribed RNA was added to 4 µl 5× first strand buffer (ThermoFisher Scientific), 1 µl  
818 10µM reverse primer, 1 µl dNTP, 1 µl 0.1M DTT, 1 µl RNaseOUT and 1 µl TGIRT-III  
819 (Ingex). The reverse-transcription reaction was incubated at 60°C for 1.5 h. 1 µl 4M NaOH  
820 was then added and incubated at 95°C for 3 min to degrade the RNA. The reverse-  
821 transcription product was mixed with an equal volume 2× Novex TBE-urea sample buffer  
822 (ThermoFisher Scientific) and run on a 10% TBE-urea gel (ThermoFisher Scientific) at  
823 200V for 1 h 15 min for size selection of cDNA that is ~250nt. The size-selected and  
824 purified cDNA was circularized using CirLigase ssDNA ligase kit (Lucigen) following  
825 manufacture's protocol. 2 µl of the circularized product was then used for PCR  
826 amplification using Phusion High-Fidelity DNA Polymerase (NEB) for a maximum of 16  
827 cycles. The PCR product was run on an 8% TBE gel at 180V for 1 h and size-selected  
828 for products ~300 nt. The product was then sequenced with iSeq100 (Illumina) to  
829 produce either 150×150-nt paired-end reads.

830

### 831 **Dual-luciferase frameshift reporter assay**

832

833 92nt and 3000nt FSEs which corresponds to nucleotides13460-13546 and nucleotides  
834 12686-15609 based on 2019- nCoV/USA-WA1/2020 were inserted into dual luciferase  
835 reporter between firefly luciferase (F-Luc) coding sequence and renilla luciferase (R-  
836 Luc) coding sequence in -1 frame. Insertion of 0-frame stop codon between FLuc and  
837 FSE element is used as negative control construct whilst a construct of matching length  
838 in which F-Luc and R-Luc were translated continuously without frameshifting is used as  
839 a positive control.

840  
841 Frameshifting reporter as well as positive and negative control mRNAs were in vitro  
842 transcribed and polyadenylated using HiScribe T7 mRNA kit (New England Biolabs)  
843 according to the manufacturers' instructions. Purified mRNAs were transfected in  
844 HEK293T cells in 24-well plates using Lipofectamine MessengerMAX (ThermoFisher). 24  
845 hours after transfection, cells were washed once with phosphate-buffered saline (PBS),  
846 and lysed in Glo Lysis Buffer (Promega) at room temperature for 5 min. 10  $\mu$ L of lysate  
847 was diluted with 30  $\mu$ L PBS before being mixed with 40  $\mu$ L Dual-Glo FLuc substrate  
848 (Promega). After 10 min, FLuc activity was measured in a GloMax 20/20 luminometer  
849 (Promega). Subsequently, 40  $\mu$ L Dual-Glo Stop & Glo reagent was added to the mixture,  
850 incubated for 10 min, and measured for RLuc luminescence. The ratio between RLuc  
851 and FLuc activities minus the negative control background luminescence and normalized  
852 to positive control luminescence was calculated as frameshift efficiency.

853

## 854 QUANTIFICATION AND STATISTICAL ANALYSIS

855

### 856 **Mapping and quantification of mutations**

857

858 Fastq files were trimmed using TrimGalore ([github.com/FelixKrueger/TrimGalore](https://github.com/FelixKrueger/TrimGalore)) to  
859 remove Illumina adapters. Trimmed paired reads were mapped to the genome of SARS-  
860 CoV-2 isolate SARS-CoV-2/human/USA/USA-WA1/2020 (GenBank: MN985325.1)  
861 (Harcourt *et al.*, 2020) using Bowtie2 (Langmead and Salzberg, 2012) with the following  
862 parameters: --local --no-unal --no-discordant --no-mixed -L 12 -X 1000. Reads aligning  
863 equally well to more than one location were discarded. SAM files from Bowtie2 were  
864 converted into BAM files using Picard Tools SamFormatConverter  
865 ([broadinstitute.github.io/picard](https://broadinstitute.github.io/picard/)).

866

867 For each pair of aligned reads, a bit vector the length of the reference sequence was  
868 generated using DREEM (Tomezsko *et al.*, 2020). Bit vectors contained a 0 at every  
869 position in the reference sequence where the reference sequence matched the read, a  
870 1 at every base at which there was a mismatch or deletion in the read, and no information  
871 for every base that was either not in the read or had a Phred score <20. We refer to  
872 positions in a bit vector with a 0 or 1 as "informative bits" and all other positions as  
873 "uninformative bits."

874

875 For each position in the reference sequence, the number of bit vectors covering the  
876 position and the number of reads with mismatches and deletions at the position were



877 counted using DREEM. The ratio of mismatches plus deletions to total coverage at each  
878 position was calculated to obtain the population average mutation rate for each position.

879

### 880 **Filtering bit vectors**

881

882 In cases indicated below, bit vectors were discarded if they had two mutations closer  
883 than 4 bases apart, had a mutation next to an uninformative bit, or had more than an  
884 allowed total number of mutations (greater than 10% of the length of the bit vector and  
885 greater than three standard deviations above the median number of mutations among  
886 all bit vectors). The average mutation rate for each position was computed from the  
887 filtered bit vectors in the same way as described above.

888

### 889 **Normalizing the mutation rates**

890

891 The mutation rates for all of the bases in the RNA molecule were sorted in numerical  
892 order. The greatest 5% or 10% of mutation rates (specified where relevant in the main  
893 text) were chosen for normalization. The median among these signals was calculated.  
894 All mutation rates were divided by this median to compute the normalized mutation rates.  
895 Normalized rates greater than 1.0 were winsorized by setting them to 1.0 (Dixon, 1960).

896

### 897 **Computing genome coverage and mutation rates**

898

899 Genome-wide coverage (Figure 1C) was computed by counting the number of unfiltered  
900 bit vectors from the in-cell library that contained an informative bit (0 or 1) at each  
901 position. Signal and noise plots (Figure 1D) were generated from the unfiltered  
902 population average mutation rate. A total of 103 (0.34%) positions across the genome  
903 were discarded for having a noise mutation rate greater than 1% in the untreated sample  
904 (likely due to endogenous modifications or “hotspot” reverse transcription errors). The  
905 signal and noise were computed every 100 nt, starting at nucleotide 51. For each of  
906 these nucleotides, the average mutation rate was computed over the 100 nt window  
907 starting 50 bases upstream and ending 49 bases downstream. The “signal” was defined  
908 as the average mutation rate of A and C, while the “noise” was defined as the average  
909 mutation rate of G and U.

910

911 The correlation of mutation rates between biological replicates genome-wide (Figure 1B)  
912 was computed using the unfiltered bit vectors. The correlation of mutation rates between  
913 different conditions of the FSE (Figure 4B) was computed using the filtered bit vectors.  
914 The correlation of mutation rates between clusters and biological replicates for the FSE  
915 (Figure 5B) was computed using the filtered bit vectors after clustering into two clusters.  
916 For all correlation plots, the Pearson correlation coefficient is given. A total of 6 (0.02%)  
917 outliers with >30% mutation rate were removed to prevent inflating the Pearson  
918 correlation coefficients.

919

### 920 **Folding the entire SARS-CoV-2 genome**

921

922 The unfiltered population average mutation rate was obtained from the in-cell library  
923 reads. The 29,882 nt genome of SARS-CoV-2 was divided into ten segments, each  
924 roughly 3 kb the boundaries of which are predicted to be open and accessible by RNAz  
925 (Rangan, Zheludev and Das, 2020). For each segment, the population average mutation  
926 rate was normalized. The segment was then folded using the Fold algorithm from  
927 RNAstructure (Mathews, 2004) with parameters -m 3 to generate the top three  
928 structures, -md to specify a maximum base pair distance, and -dms to use the  
929 normalized mutation rates as constraints in folding. All mutation rates on G and U bases  
930 were set to -999 (unavailable constrains). Connectivity Table files output from Fold were  
931 converted to dot bracket format using ct2dot from RNAstructure (Mathews, 2004). The  
932 ten dot bracket structures were concatenated into a single genome-wide structure.

933

### 934 **The data-structure correlation index (DSCI)**

935

936 The data-structure correlation index (DSCI) quantifies how well a secondary structure  
937 model is supported by DMS or SHAPE reactivity data, under the assumption that  
938 genuinely unpaired bases are more reactive than paired bases. Given a secondary  
939 structure model in which every base is designated as paired or unpaired, and reactivity  
940 values for all or for a subset of bases in the model, the DSCI is defined as the probability  
941 that a randomly chosen unpaired base will have greater reactivity than a randomly  
942 chosen paired base. It is equal to the following:

$$943 \quad DSCI = \frac{1}{mn} \sum_{i=1}^m \sum_{j=1}^n 1 \text{ if } p_i < u_j \text{ else } 0$$

944 where  $p$  is the set of reactivities for all  $m$  paired bases (indexed by  $i$ ) and  $u$  is the set of  
945 reactivities all  $n$  paired bases (indexed by  $j$ ). Bases without reactivity information (such  
946 as Gs and Us for DMS data, and any problematic base) are excluded from  $p$  and  $u$ .

947

948 The DSCI is closely related to the Mann-Whitney  $U$  statistic (Mann and Whitney, 1947),  
949 which is obtained from the above equation without dividing by  $mn$  (assuming no ties in  
950 reactivities). The calculation is implemented in Python using the SciPy Stats  
951 MannWhitneyU function (Virtanen *et al.*, 2020), and dividing the result by  $mn$ . If  $\min(m,$   
952  $n) < 5$ , then we return a missing value to avoid biases caused by very low numbers of  
953 paired or unpaired bases.

954

### 955 **The modified Fowlkes-Mallows index (mFMI)**

956

957 Given two RNA structures of the same length ( $L$ ) in dot-bracket notation, all base pairs  
958 in each structure were identified. Each base pair was represented as a tuple of (position  
959 of 5' base, position of 3' base). The number of base pairs common to both structures  
960 ( $P_{12}$ ) as well as the number of base pairs unique to the first structure ( $P_1$ ) and to the  
961 second structure ( $P_2$ ) were computed. Given these quantities, the Fowlkes-Mallows  
962 index (a measure of similarity between two binary classifiers) is defined as  $FMI =$   
963  $P_{12} / \sqrt{(P_{12} + P_1)(P_{12} + P_2)}$  (Fowlkes and Mallows, 1983). In the case that  $(P_{12} + P_1)(P_{12} +$   
964  $P_2) = 0$ , we let  $FMI = 0$ .

965

966 As the Fowlkes-Mallows index does not consider positions at which the structures agree  
967 on bases that are unpaired, the index needed to be modified; otherwise regions with few  
968 base pairs would tend to score too low. Thus, the number of positions at which both  
969 sequences contained an unpaired base ( $U$ ) was computed. Two variations of the  
970 modified Fowlkes-Mallows index (mFMI) were tested that differed in their treatment of  
971 externally paired bases, defined as bases paired to another base outside of the region  
972 of the structure being compared. The version of mFMI excluding external base pairs  
973 counted all externally paired bases as unpaired when computing  $U$ . The number of  
974 positions containing a paired base ( $P$ ) was computed as  $P = L - U$ . In this case, mFMI  
975 was defined as  $mFMI = U/L + P/L \times FMI$ , which weights the Fowlkes-Mallows index by  
976 the fraction of paired bases and adds the fraction of unpaired bases ( $U/L$ ), as the  
977 structures agree at all unpaired positions.

978

979 To include external base pairs, any position containing an externally paired base was not  
980 counted in  $U$ . The number of positions at which both structures contained an externally  
981 paired base with the same orientation (i.e. both facing in the 5' or 3' direction) was  
982 computed as the number  $E$ . The number of positions at which at least one structure  
983 contained a base that was paired, but not externally, was computed as  $P$ . Then, the  
984 mFMI was defined as  $mFMI = U/L + E/L + P/L \times FMI$ , which weights the Fowlkes-  
985 Mallows index by the fraction of positions containing a paired base and considers  
986 positions in which both bases are unpaired as in agreement, but only counts externally  
987 paired bases as agreeing if both structures contain an externally paired base at the same  
988 position and the base pairs have the same orientation.

989

### 990 **Comparisons to previous *in silico* predictions**

991

992 Excel files from the supplemental material of (Rangan, Zheludev and Das, 2020) were  
993 parsed to obtain the coordinates and predicted structures. For each predicted structure,  
994 agreement with the region of our structure with the same coordinates was computed  
995 using the mFMI, either including or excluding external base pairs (as specified in the  
996 text). Box plots of the agreement for each window (Figure 3B) show the minimum, first  
997 quartile, median, third quartile, and maximum; data lying more than 1.5 times the  
998 interquartile range from the nearest quartile are considered outliers and are plotted as  
999 individual points. The numbers of points in each box plot are given in the Results section  
1000 for Figure 3B.

1001

### 1002 **Folding the frameshift stimulating element**

1003

1004 Reads from RT-PCR of a 283 nt segment of in-cell RNA spanning the FSE (nucleotides  
1005 13,342 - 13,624) were used to generate bit vectors. The bit vectors were filtered as  
1006 described above, and the filtered average mutation rates were normalized. The RNA was  
1007 folded using the ShapeKnots algorithm from RNAstructure (Hajdin *et al.*, 2013) with  
1008 parameters -m 3 to generate three structures and -dms to use the normalized mutation  
1009 rates as constraints in folding. All signals on G and U bases were set to -999 (unavailable

1010 constrains). Connectivity Table files output from Fold were converted to dot bracket  
1011 format using ct2dot from RNAstructure (Mathews, 2004).

1012

### 1013 **Coronavirus sequence alignments**

1014

1015 Accession numbers of curated sarbecovirus and merbecovirus genomes were obtained  
1016 from (Ceraolo and Giorgi, 2020) and downloaded from NCBI. The sequences were  
1017 aligned using the MUSCLE (Edgar, 2004) web service with default parameters. The  
1018 region of the multiple sequence alignment spanning the two sides of Alternative Stem 1  
1019 was located and the sequence conservation computed using custom Python scripts.

1020

1021 For the alignment of all betacoronaviruses with genomes in NCBI RefSeq (O’Leary *et al.*,  
1022 2016), all reference genomes of betacoronaviruses were downloaded from RefSeq using  
1023 the query “betacoronavirus[organism] AND complete genome” with the RefSeq source  
1024 database as a filter. The sequences were aligned using the MUSCLE (Edgar, 2004) web  
1025 service with default parameters. The subgenus of betacoronavirus to which each virus  
1026 belonged was obtained from the NCBI taxonomy database (Sayers *et al.*, 2009).

1027

### 1028 **Detecting alternative structures genome-wide**

1029

1030 The reference genome (length = 29,882 nt) was partitioned into 373 regions of 80 nt each  
1031 and one final region of 42 nt. For each region, reads were filtered out according to the  
1032 criteria in “Filtering Bit Vectors” or if they did not overlap with at least 20% (16 nt) of the  
1033 region. The reads were then clustered using the EM algorithm implemented previously  
1034 (Tomezsko *et al.*, 2020) using a maximum of two clusters per region, ignoring G and U  
1035 residues, and setting all mutation rates less than 0.005 to 0.0.

1036

1037 After clustering, regions were filtered out if fewer than 100,000 reads mapped to the  
1038 region ( $n = 42$ ) or if either cluster contained a base with a mutation rate exceeding 30%  
1039 ( $n = 16$ ). For each remaining region with two clusters ( $n = 316$ ), each cluster’s mutation  
1040 rates ( $\mu$ ) were normalized by setting the base with the highest mutation rate to 1.0 and  
1041 scaling the mutation rates of all other bases proportionally. For each base, the difference  
1042 in DMS reactivities ( $\Delta DMS$ ) between its mutation rate in cluster 1 ( $\mu_1$ ) and cluster 2 ( $\mu_2$ )  
1043 was calculated as  $\Delta DMS = |\mu_1 - \mu_2| \div \sqrt{2}$ . The coefficient of determination ( $R^2$ ) was also  
1044 computed on the normalized DMS reactivities.

1045

### 1046 **Detecting alternative structures of the FSE**

1047

1048 The filtered bit vectors (the same used to fold the frameshift stimulating element) were  
1049 clustered using the expectation maximization algorithm of DREEM to allow detection of  
1050 a maximum of two alternative structures (Tomezsko *et al.*, 2020).

1051

### 1052 **Quantification of minus-strand reads**

1053

1054 Mapped reads from the in-cell library were classified as minus-strand using a custom  
1055 Python script if they had the following SAM flags (Li *et al.*, 2009): PAIRED and  
1056 PROPER\_PAIR and ({READ1 and MREVERSE and not REVERSE} or {READ2 and  
1057 REVERSE and not MREVERSE}) and not (UNMAP or MUNMAP or SECONDARY or  
1058 QCFAIL or DUP or SUPPLEMENTARY).

1059

### 1060 **Visualizing RNA structures**

1061

1062 RNA structures were drawn using VARNA (Darty, Denise and Ponty, 2009). The bases  
1063 were colored using the normalized DMS signals.

1064

1065 **Supplementary Figure legends**

1066  
1067 **Supplementary Figure 1: In-cell data-derived secondary structure of the full SARS-**  
1068 **CoV-2 genome.**

1069  
1070 **Supplementary Figure 2: Genome-wide data-structure correlation index (DSCI) for**  
1071 **population average models from this study, Huston et al., and Manfredonia et al.**

1072  
1073 **Supplementary Figure 3: Genome-wide pairwise similarity of population average**  
1074 **models from this study, Huston et al., and Manfredonia et al.**

1075  
1076 **Supplementary Figure 4: Comparison of our in-cell genome-wide structure model**  
1077 **with previous computational models**

1078 **(A)** Consistency of our in-cell structure models. Agreement is given between our  
1079 structure models predicted using a maximum distance limit of 120 nt and 350 nt between  
1080 paired bases at 5% signal normalization and between our predictions using 5% and 10%  
1081 DMS normalization at 350 nt maximum allowed base pair distance.

1082 **(B)** Agreement of our structure model with all predicted structures from RNAz and  
1083 Contrafold. Agreement is given for both excluding and including external base pairs.

1084 **(C)** Agreement of our structure with a previous model from RNAz across the genome. At  
1085 positions for which multiple RNAz model exists, the average agreement with all models  
1086 is given.

1087 **(D)** Agreement of our model with RNAz predicted structures with the three highest P-  
1088 values in regions with previously unannotated structures.

1089 **(E)** Agreement of our model with Contrafold predicted structures with the five highest  
1090 maximum expected accuracies in evolutionarily conserved regions.

1091 **(F)** Agreement of our TRS structure models to RNAz predicted structures. For TRSs for  
1092 which multiple RNAz models exist, agreement with each prediction is shown.

1093  
1094 **Supplementary Figure 5: Structured and unstructured regions in the SARS-CoV-2**  
1095 **genome.**

1096 **(A)** Locations of highly structured and unstructured regions in the SARS-CoV-2 genome.  
1097 Highly structured regions are defined as stretches of at least 10 consecutive paired  
1098 bases; unstructured regions shown are stretches of at least 14 consecutive unpaired  
1099 bases. The thickness of each bar is proportional to the number of consecutive paired  
1100 (blue) or unpaired (orange) bases. The data is plotted over a schematic of the genome,  
1101 highlighting the organization of open reading frames (ORFs) and the transcription  
1102 regulatory sequences (TRS).

1103 **(B)** In-cell model of each of the eight TRSs predicted to lie within a stem loop. The core  
1104 sequence (CS) of each TRS is outlined in black. Models are arranged in genomic order  
1105 from top-to-bottom, left-to-right.

1106  
1107 **Supplementary Figure 6: Relationship of DSCI and median  $\Delta$ DMS for every**  
1108 **overlapping 80nt window genome-wide**



1109 **References**

- 1110
- 1111 Andrews, R. J. *et al.* (2020) *An in silico map of the SARS-CoV-2 RNA Structurome.*,  
1112 *bioRxiv: the preprint server for biology*. doi: 10.1101/2020.04.17.045161.
- 1113 Banerjee, A. K. *et al.* (2020) 'SARS-CoV-2 Disrupts Splicing, Translation, and Protein  
1114 Trafficking to Suppress Host Defenses', *Cell*. doi: 10.1016/j.cell.2020.10.004.
- 1115 Brierley, I. *et al.* (1987) 'An efficient ribosomal frame-shifting signal in the polymerase-  
1116 encoding region of the coronavirus IBV.', *The EMBO journal*. doi: 10.1002/j.1460-  
1117 2075.1987.tb02713.x.
- 1118 Brierley, I., Digard, P. and Inglis, S. C. (1989) 'Characterization of an efficient coronavirus  
1119 ribosomal frameshifting signal: Requirement for an RNA pseudoknot', *Cell*. doi:  
1120 10.1016/0092-8674(89)90124-4.
- 1121 Ceraolo, C. and Giorgi, F. M. (2020) 'Genomic variance of the 2019-nCoV coronavirus',  
1122 *Journal of Medical Virology*. doi: 10.1002/jmv.25700.
- 1123 Cordero, P. *et al.* (2012) 'Quantitative dimethyl sulfate mapping for automated RNA  
1124 secondary structure inference', *Biochemistry*. doi: 10.1021/bi3008802.
- 1125 Cornilescu, G. *et al.* (2016) 'Structural Analysis of Multi-Helical RNAs by NMR-  
1126 SAXS/WAXS: Application to the U4/U6 di-snRNA', *Journal of Molecular Biology*. doi:  
1127 10.1016/j.jmb.2015.11.026.
- 1128 Darty, K., Denise, A. and Ponty, Y. (2009) 'VARNA: Interactive drawing and editing of the  
1129 RNA secondary structure', *Bioinformatics*. doi: 10.1093/bioinformatics/btp250.
- 1130 Dixon, W. J. (1960) 'Simplified Estimation from Censored Normal Samples', *The Annals*  
1131 *of Mathematical Statistics*. doi: 10.1214/aoms/1177705900.
- 1132 Do, C. B., Woods, D. A. and Batzoglou, S. (2006) 'CONTRAFold: RNA secondary  
1133 structure prediction without physics-based models', in *Bioinformatics*. doi:  
1134 10.1093/bioinformatics/btl246.
- 1135 Edgar, R. C. (2004) 'MUSCLE: Multiple sequence alignment with high accuracy and high  
1136 throughput', *Nucleic Acids Research*. doi: 10.1093/nar/gkh340.
- 1137 Finkel, Y. *et al.* (2021) 'The coding capacity of SARS-CoV-2', *Nature*. doi:  
1138 10.1038/s41586-020-2739-1.
- 1139 Fowlkes, E. B. and Mallows, C. L. (1983) 'A method for comparing two hierarchical  
1140 clusterings', *Journal of the American Statistical Association*. doi:  
1141 10.1080/01621459.1983.10478008.
- 1142 Grentzmann, G. *et al.* (1998) 'A dual-luciferase reporter system for studying recoding  
1143 signals', *RNA*.
- 1144 Gruber, A. R. *et al.* (2010) 'RNAZ 2.0: Improved noncoding RNA detection', in *Pacific*  
1145 *Symposium on Biocomputing 2010, PSB 2010*.
- 1146 Hajdin, C. E. *et al.* (2013) 'Accurate SHAPE-directed RNA secondary structure modeling,

- 1147 including pseudoknots', *Proceedings of the National Academy of Sciences of the United*  
1148 *States of America*. doi: 10.1073/pnas.1219988110.
- 1149 Harcourt, J. *et al.* (2020) 'Severe acute respiratory syndrome coronavirus 2 from patient  
1150 with coronavirus disease, United States', *Emerging Infectious Diseases*. doi:  
1151 10.3201/EID2606.200516.
- 1152 Huston, N. *et al.* (2020) 'Comprehensive in-vivo secondary structure of the SARS-CoV-  
1153 2 genome reveals novel regulatory motifs and mechanisms', *bioRxiv: the preprint server*  
1154 *for biology*. doi: 10.1101/2020.07.10.197079.
- 1155 Kalvari, I. *et al.* (2018) 'Rfam 13.0: Shifting to a genome-centric resource for non-coding  
1156 RNA families', *Nucleic Acids Research*. doi: 10.1093/nar/gkx1038.
- 1157 Kelly, J. A. *et al.* (2020) 'Structural and functional conservation of the programmed -1  
1158 ribosomal frameshift signal of SARS coronavirus 2 (SARS-CoV-2)', *Journal of Biological*  
1159 *Chemistry*. doi: 10.1074/jbc.AC120.013449.
- 1160 Kim, D. *et al.* (2020) 'The Architecture of SARS-CoV-2 Transcriptome', *Cell*. doi:  
1161 10.1016/j.cell.2020.04.011.
- 1162 Lange, S. J. *et al.* (2012) 'Global or local? Predicting secondary structure and  
1163 accessibility in mRNAs', *Nucleic Acids Research*. doi: 10.1093/nar/gks181.
- 1164 Langmead, B. and Salzberg, S. L. (2012) 'Fast gapped-read alignment with Bowtie 2',  
1165 *Nature Methods*. doi: 10.1038/nmeth.1923.
- 1166 Li, H. *et al.* (2009) 'The Sequence Alignment/Map format and SAMtools', *Bioinformatics*.  
1167 doi: 10.1093/bioinformatics/btp352.
- 1168 Li, L. *et al.* (2008) 'Structural Lability in Stem-Loop 1 Drives a 5' UTR-3' UTR Interaction  
1169 in Coronavirus Replication', *Journal of Molecular Biology*. doi:  
1170 10.1016/j.jmb.2008.01.068.
- 1171 Liu, P. *et al.* (2007) 'A U-turn motif-containing stem-loop in the coronavirus 5'  
1172 untranslated region plays a functional role in replication', *RNA*. doi: 10.1261/rna.261807.
- 1173 Madhugiri, R. *et al.* (2018) 'Structural and functional conservation of cis-acting RNA  
1174 elements in coronavirus 5'-terminal genome regions', *Virology*. doi:  
1175 10.1016/j.virol.2017.11.025.
- 1176 Manfredonia, I. *et al.* (2020) 'Genome-wide mapping of SARS-CoV-2 RNA structures  
1177 identifies therapeutically-relevant elements', *Nucleic acids research*. doi:  
1178 10.1093/nar/gkaa1053.
- 1179 Mann, H. B. and Whitney, D. R. (1947) 'On a Test of Whether one of Two Random  
1180 Variables is Stochastically Larger than the Other', *The Annals of Mathematical Statistics*.  
1181 doi: 10.1214/aoms/1177730491.
- 1182 Masters, P. S. (2006) 'The Molecular Biology of Coronaviruses', *Advances in Virus*  
1183 *Research*. doi: 10.1016/S0065-3527(06)66005-3.
- 1184 Mathews, D. H. (2004) 'Using an RNA secondary structure partition function to determine

- 1185 confidence in base pairs predicted by free energy minimization', *RNA*. doi:  
1186 10.1261/rna.7650904.
- 1187 Miao, Z. *et al.* (2020) 'Secondary structure of the SARS-CoV-2 5'-UTR', *RNA Biology*.  
1188 doi: 10.1080/15476286.2020.1814556.
- 1189 Neupane, K. *et al.* (2020) 'Structural dynamics of the SARS-CoV-2 frameshift-stimulatory  
1190 pseudoknot reveal topologically distinct conformers', *bioRxiv*.
- 1191 O'Leary, N. A. *et al.* (2016) 'Reference sequence (RefSeq) database at NCBI: Current  
1192 status, taxonomic expansion, and functional annotation', *Nucleic Acids Research*. doi:  
1193 10.1093/nar/gkv1189.
- 1194 Pfeiffer, F. *et al.* (2018) 'Systematic evaluation of error rates and causes in short samples  
1195 in next-generation sequencing', *Scientific Reports*. doi: 10.1038/s41598-018-29325-6.
- 1196 Plant, E. P. *et al.* (2005) 'A three-stemmed mRNA pseudoknot in the SARS coronavirus  
1197 frameshift signal', *PLoS Biology*. doi: 10.1371/journal.pbio.0030172.
- 1198 Plant, E. P. *et al.* (2010) 'Achieving a Golden Mean: Mechanisms by Which Coronaviruses  
1199 Ensure Synthesis of the Correct Stoichiometric Ratios of Viral Proteins', *Journal of*  
1200 *Virology*. doi: 10.1128/jvi.02480-09.
- 1201 Plant, E. P. and Dinman, J. D. (2008) 'The role of programmed-1 ribosomal frameshifting  
1202 in coronavirus propagation', *Frontiers in Bioscience*. doi: 10.2741/3046.
- 1203 Puray-Chavez, M. *et al.* (2020) 'The translational landscape of SARS-CoV-2 and infected  
1204 cells', *bioRxiv*. doi: 10.1101/2020.11.03.367516.
- 1205 Rangan, R., Zheludev, I. N. and Das, R. (2020) 'RNA genome conservation and  
1206 secondary structure in SARS-CoV-2 and SARS-related viruses: a first look', *RNA*. doi:  
1207 10.1261/rna.076141.120.
- 1208 Rouskin, S. *et al.* (2014) 'Genome-wide probing of RNA structure reveals active unfolding  
1209 of mRNA structures in vivo', *Nature*. doi: 10.1038/nature12894.
- 1210 Sayers, E. W. *et al.* (2009) 'Database resources of the National Center for Biotechnology  
1211 Information', *Nucleic Acids Research*. doi: 10.1093/nar/gkn741.
- 1212 Siegfried, N. A. *et al.* (2014) 'RNA motif discovery by SHAPE and mutational profiling  
1213 (SHAPE-MaP)', *Nature methods*. doi: 10.1038/nmeth.3029.
- 1214 Sola, I. *et al.* (2015) 'Continuous and Discontinuous RNA Synthesis in Coronaviruses',  
1215 *Annual Review of Virology*. doi: 10.1146/annurev-virology-100114-055218.
- 1216 Spitale, R. C. *et al.* (2015) 'Structural imprints in vivo decode RNA regulatory  
1217 mechanisms', *Nature*. doi: 10.1038/nature14263.
- 1218 Sun, Y. *et al.* (2020) 'Restriction of SARS-CoV-2 replication by targeting programmed -1  
1219 ribosomal frameshifting in vitro', *bioRxiv*. doi: 10.1101/2020.10.21.349225.
- 1220 Tomezsko, P. J. *et al.* (2020) 'Determination of RNA structural diversity and its role in  
1221 HIV-1 RNA splicing', *Nature*. doi: 10.1038/s41586-020-2253-5.
- 1222 Virtanen, P. *et al.* (2020) 'SciPy 1.0: fundamental algorithms for scientific computing in

- 1223 Python', *Nature Methods*. doi: 10.1038/s41592-019-0686-2.
- 1224 Watts, J. M. *et al.* (2009) 'Architecture and secondary structure of an entire HIV-1 RNA  
1225 genome', *Nature*. doi: 10.1038/nature08237.
- 1226 Yang, D. *et al.* (2011) 'Mouse Hepatitis Virus Stem-Loop 4 Functions as a Spacer Element  
1227 Required To Drive Subgenomic RNA Synthesis', *Journal of Virology*. doi:  
1228 10.1128/jvi.05092-11.
- 1229 Yang, D. and Leibowitz, J. L. (2015) 'The structure and functions of coronavirus genomic  
1230 3' and 5' ends', *Virus Research*. doi: 10.1016/j.virusres.2015.02.025.
- 1231 Zhang, K. *et al.* (2020) 'Cryo-electron Microscopy and Exploratory Antisense Targeting  
1232 of the 28-kDa Frameshift Stimulation Element from the SARS-CoV-2 RNA Genome',  
1233 *bioRxiv*. doi: 10.1101/2020.07.18.209270.
- 1234 Ziv, O. *et al.* (2020) 'The Short- and Long-Range RNA-RNA Interactome of SARS-CoV-  
1235 2', *Molecular Cell*. doi: 10.1016/j.molcel.2020.11.004.
- 1236 Zubradt, M. *et al.* (2016) 'DMS-MaPseq for genome-wide or targeted RNA structure  
1237 probing in vivo', *Nature Methods*. doi: 10.1038/nmeth.4057.
- 1238
